# Supplementary material for: Airway immune signatures of protection and disease progression in recent human tuberculosis household contacts
Source: bioRxiv preprint, doi:10.64898/2026.01.29.702551, version 1 (2026-02-02)
Supplement: Supplementary Table 2 [file 702551_file04.xlsx]

## Sheet: ext_data_2a_gene_list
Heatmap cluster (in descending order)	Ensembl ID	Gene symbol
6	ENSG00000002726	AOC1
6	ENSG00000005001	PRSS22
6	ENSG00000007306	CEACAM7
6	ENSG00000008735	MAPK8IP2
6	ENSG00000011332	DPF1
6	ENSG00000012171	SEMA3B
6	ENSG00000016602	CLCA4
6	ENSG00000023909	GCLM
6	ENSG00000061656	SPAG4
6	ENSG00000062524	LTK
6	ENSG00000064300	NGFR
6	ENSG00000065621	GSTO2
6	ENSG00000065665	SEC61A2
6	ENSG00000066230	SLC9A3
6	ENSG00000067840	PDZD4
6	ENSG00000069011	PITX1
6	ENSG00000069020	MAST4
6	ENSG00000069431	ABCC9
6	ENSG00000074211	PPP2R2C
6	ENSG00000077800	FKBP6
6	ENSG00000087128	TMPRSS11E
6	ENSG00000091137	SLC26A4
6	ENSG00000091428	RAPGEF4
6	ENSG00000095066	HOOK2
6	ENSG00000095397	WHRN
6	ENSG00000096006	CRISP3
6	ENSG00000100197	CYP2D6
6	ENSG00000101210	EEF1A2
6	ENSG00000101825	MXRA5
6	ENSG00000102547	CAB39L
6	ENSG00000103269	RHBDL1
6	ENSG00000103888	CEMIP
6	ENSG00000104368	PLAT
6	ENSG00000104892	KLC3
6	ENSG00000105427	CNFN
6	ENSG00000105514	RAB3D
6	ENSG00000105655	ISYNA1
6	ENSG00000105767	CADM4
6	ENSG00000106714	CNTNAP3
6	ENSG00000108244	KRT23
6	ENSG00000108342	CSF3
6	ENSG00000108839	ALOX12
6	ENSG00000108984	MAP2K6
6	ENSG00000110944	IL23A
6	ENSG00000111261	MANSC1
6	ENSG00000111696	NT5DC3
6	ENSG00000114315	HES1
6	ENSG00000115306	SPTBN1
6	ENSG00000115556	PLCD4
6	ENSG00000115598	IL1RL2
6	ENSG00000116254	CHD5
6	ENSG00000118898	PPL
6	ENSG00000119681	LTBP2
6	ENSG00000119698	PPP4R4
6	ENSG00000119938	PPP1R3C
6	ENSG00000119943	PYROXD2
6	ENSG00000120156	TEK
6	ENSG00000120278	PLEKHG1
6	ENSG00000120337	TNFSF18
6	ENSG00000120738	EGR1
6	ENSG00000121380	BCL2L14
6	ENSG00000121454	LHX4
6	ENSG00000122012	SV2C
6	ENSG00000123901	GPR83
6	ENSG00000124107	SLPI
6	ENSG00000125498	KIR2DL1
6	ENSG00000125730	C3
6	ENSG00000125775	SDCBP2
6	ENSG00000125780	TGM3
6	ENSG00000126803	HSPA2
6	ENSG00000126878	AIF1L
6	ENSG00000127328	RAB3IP
6	ENSG00000128342	LIF
6	ENSG00000128422	KRT17
6	ENSG00000128510	CPA4
6	ENSG00000128965	CHAC1
6	ENSG00000129038	LOXL1
6	ENSG00000129437	KLK14
6	ENSG00000129521	EGLN3
6	ENSG00000130595	TNNT3
6	ENSG00000130821	SLC6A8
6	ENSG00000131037	EPS8L1
6	ENSG00000131188	PRR7
6	ENSG00000133101	CCNA1
6	ENSG00000133392	MYH11
6	ENSG00000133710	SPINK5
6	ENSG00000133962	CATSPERB
6	ENSG00000134198	TSPAN2
6	ENSG00000134339	SAA2
6	ENSG00000135378	PRRG4
6	ENSG00000135407	AVIL
6	ENSG00000135914	HTR2B
6	ENSG00000136059	VILL
6	ENSG00000136155	SCEL
6	ENSG00000136694	IL36A
6	ENSG00000137460	FHDC1
6	ENSG00000137878	GCOM1
6	ENSG00000138311	ZNF365
6	ENSG00000138669	PRKG2
6	ENSG00000139926	FRMD6
6	ENSG00000140297	GCNT3
6	ENSG00000140443	IGF1R
6	ENSG00000140519	RHCG
6	ENSG00000142619	PADI3
6	ENSG00000142623	PADI1
6	ENSG00000142910	TINAGL1
6	ENSG00000143320	CRABP2
6	ENSG00000143367	TUFT1
6	ENSG00000143369	ECM1
6	ENSG00000143536	CRNN
6	ENSG00000143631	FLG
6	ENSG00000143797	MBOAT2
6	ENSG00000144063	MALL
6	ENSG00000144648	ACKR2
6	ENSG00000144847	IGSF11
6	ENSG00000145632	PLK2
6	ENSG00000145911	N4BP3
6	ENSG00000146122	DAAM2
6	ENSG00000146453	PNLDC1
6	ENSG00000147166	ITGB1BP2
6	ENSG00000147883	CDKN2B
6	ENSG00000148344	PTGES
6	ENSG00000149557	FEZ1
6	ENSG00000149564	ESAM
6	ENSG00000149596	JPH2
6	ENSG00000149926	TLCD3B
6	ENSG00000149948	HMGA2
6	ENSG00000152137	HSPB8
6	ENSG00000153291	SLC25A27
6	ENSG00000153802	TMPRSS11D
6	ENSG00000154188	ANGPT1
6	ENSG00000154227	CERS3
6	ENSG00000154548	SRSF12
6	ENSG00000154975	CA10
6	ENSG00000158125	XDH
6	ENSG00000158246	TENT5B
6	ENSG00000158352	SHROOM4
6	ENSG00000158856	DMTN
6	ENSG00000159208	CIART
6	ENSG00000159263	SIM2
6	ENSG00000160588	MPZL3
6	ENSG00000160716	CHRNB2
6	ENSG00000161036	LRWD1
6	ENSG00000162366	PDZK1IP1
6	ENSG00000162510	MATN1
6	ENSG00000162545	CAMK2N1
6	ENSG00000163155	LYSMD1
6	ENSG00000163209	SPRR3
6	ENSG00000163216	SPRR2D
6	ENSG00000163235	TGFA
6	ENSG00000163645	ERICH6
6	ENSG00000163993	S100P
6	ENSG00000164251	F2RL1
6	ENSG00000164404	GDF9
6	ENSG00000164776	PHKG1
6	ENSG00000165521	EML5
6	ENSG00000165799	RNASE7
6	ENSG00000166073	GPR176
6	ENSG00000166126	AMN
6	ENSG00000166183	ASPG
6	ENSG00000166317	SYNPO2L
6	ENSG00000166349	RAG1
6	ENSG00000166535	A2ML1
6	ENSG00000167080	B4GALNT2
6	ENSG00000167210	LOXHD1
6	ENSG00000167759	KLK13
6	ENSG00000167767	KRT80
6	ENSG00000168243	GNG4
6	ENSG00000168679	SLC16A4
6	ENSG00000169247	SH3TC2
6	ENSG00000169469	SPRR1B
6	ENSG00000169894	MUC3A
6	ENSG00000169902	TPST1
6	ENSG00000170423	KRT78
6	ENSG00000170477	KRT4
6	ENSG00000170579	DLGAP1
6	ENSG00000171385	KCND3
6	ENSG00000171401	KRT13
6	ENSG00000171951	SCG2
6	ENSG00000172000	ZNF556
6	ENSG00000172005	MAL
6	ENSG00000172379	ARNT2
6	ENSG00000172382	PRSS27
6	ENSG00000172602	RND1
6	ENSG00000172613	RAD9A
6	ENSG00000172927	MYEOV
6	ENSG00000173262	SLC2A14
6	ENSG00000173432	SAA1
6	ENSG00000173926	MARCHF3
6	ENSG00000173930	SLCO4C1
6	ENSG00000174469	CNTNAP2
6	ENSG00000174564	IL20RB
6	ENSG00000174871	CNIH2
6	ENSG00000175130	MARCKSL1
6	ENSG00000175183	CSRP2
6	ENSG00000175356	SCUBE2
6	ENSG00000175591	P2RY2
6	ENSG00000175920	DOK7
6	ENSG00000176092	CRYBG2
6	ENSG00000176406	RIMS2
6	ENSG00000176928	GCNT4
6	ENSG00000177989	ODF3B
6	ENSG00000178732	GP5
6	ENSG00000178919	FOXE1
6	ENSG00000179930	ZNF648
6	ENSG00000180113	TDRD6
6	ENSG00000180251	SLC9A4
6	ENSG00000181023	OR56B1
6	ENSG00000181074	OR52N4
6	ENSG00000182224	CYB5D1
6	ENSG00000182389	CACNB4
6	ENSG00000183018	SPNS2
6	ENSG00000183347	GBP6
6	ENSG00000183508	TENT5C
6	ENSG00000183570	PCBP3
6	ENSG00000183778	B3GALT5
6	ENSG00000184792	OSBP2
6	ENSG00000185033	SEMA4B
6	ENSG00000185156	MFSD6L
6	ENSG00000185873	TMPRSS11B
6	ENSG00000186205	MTARC1
6	ENSG00000186352	ANKRD37
6	ENSG00000186832	KRT16
6	ENSG00000186918	ZNF395
6	ENSG00000186998	EMID1
6	ENSG00000187268	FAM9C
6	ENSG00000187486	KCNJ11
6	ENSG00000187678	SPRY4
6	ENSG00000188263	IL17REL
6	ENSG00000188375	H3-5
6	ENSG00000188505	NCCRP1
6	ENSG00000188559	RALGAPA2
6	ENSG00000189051	RNF222
6	ENSG00000189120	SP6
6	ENSG00000196557	CACNA1H
6	ENSG00000196739	COL27A1
6	ENSG00000196993	NPIPB9
6	ENSG00000197121	PGAP1
6	ENSG00000197191	CYSRT1
6	ENSG00000197279	ZNF165
6	ENSG00000197353	LYPD2
6	ENSG00000197361	FBXL22
6	ENSG00000197959	DNM3
6	ENSG00000198535	C2CD4A
6	ENSG00000203785	SPRR2E
6	ENSG00000203965	EFCAB7
6	ENSG00000204428	LY6G5C
6	ENSG00000204544	MUC21
6	ENSG00000205177	C11orf91
6	ENSG00000205923	CEMP1
6	ENSG00000206073	SERPINB4
6	ENSG00000211448	DIO2
6	ENSG00000212993	POU5F1B
6	ENSG00000214711	CAPN14
6	ENSG00000215853	RPTN
6	ENSG00000223573	TINCR
6	ENSG00000227268	KLLN
6	ENSG00000233232	NPIPB7
6	ENSG00000234511	C5orf58
6	ENSG00000234965	SHISA8
6	ENSG00000237330	RNF223
6	ENSG00000239920
6	ENSG00000241794	SPRR2A
6	ENSG00000248485	PCP4L1
6	ENSG00000254806	SYS1-DBNDD2
6	ENSG00000254852	NPIPA2
6	ENSG00000255071	SAA2-SAA4
6	ENSG00000255587	RAB44
6	ENSG00000259024	TVP23C-CDRT4
6	ENSG00000261272	MUC22
6	ENSG00000264324
6	ENSG00000270276	H4C15
6	ENSG00000272636	DOC2B
6	ENSG00000283378	CNTNAP3C
6	ENSG00000283761
6	ENSG00000283787	PRR33
6	ENSG00000285733
6	ENSG00000285837
6	ENSG00000285991
9	ENSG00000004468	CD38
9	ENSG00000008056	SYN1
9	ENSG00000009790	TRAF3IP3
9	ENSG00000009950	MLXIPL
9	ENSG00000013297	CLDN11
9	ENSG00000019186	CYP24A1
9	ENSG00000023445	BIRC3
9	ENSG00000023839	ABCC2
9	ENSG00000025708	TYMP
9	ENSG00000026950	BTN3A1
9	ENSG00000028277	POU2F2
9	ENSG00000029153	BMAL2
9	ENSG00000050344	NFE2L3
9	ENSG00000051128	HOMER3
9	ENSG00000055163	CYFIP2
9	ENSG00000057704	TMCC3
9	ENSG00000061273	HDAC7
9	ENSG00000062282	DGAT2
9	ENSG00000064886	CHI3L2
9	ENSG00000067048	DDX3Y
9	ENSG00000068079	IFI35
9	ENSG00000070182	SPTB
9	ENSG00000072694	FCGR2B
9	ENSG00000072952	IRAG1
9	ENSG00000074416	MGLL
9	ENSG00000075618	FSCN1
9	ENSG00000076641	PAG1
9	ENSG00000076662	ICAM3
9	ENSG00000078081	LAMP3
9	ENSG00000079263	SP140
9	ENSG00000081800	SLC13A1
9	ENSG00000082293	COL19A1
9	ENSG00000083799	CYLD
9	ENSG00000084110	HAL
9	ENSG00000085265	FCN1
9	ENSG00000087085	ACHE
9	ENSG00000087589	CASS4
9	ENSG00000089127	OAS1
9	ENSG00000089159	PXN
9	ENSG00000089505	CMTM1
9	ENSG00000090238	YPEL3
9	ENSG00000092295	TGM1
9	ENSG00000092758	COL9A3
9	ENSG00000100302	RASD2
9	ENSG00000100342	APOL1
9	ENSG00000100453	GZMB
9	ENSG00000100505	TRIM9
9	ENSG00000101307	SIRPB1
9	ENSG00000101977	MCF2
9	ENSG00000102265	TIMP1
9	ENSG00000102445	RUBCNL
9	ENSG00000102524	TNFSF13B
9	ENSG00000102886	GDPD3
9	ENSG00000102962	CCL22
9	ENSG00000103154	NECAB2
9	ENSG00000104332	SFRP1
9	ENSG00000104899	AMH
9	ENSG00000104951	IL4I1
9	ENSG00000104974	LILRA1
9	ENSG00000105270	CLIP3
9	ENSG00000105287	PRKD2
9	ENSG00000105369	CD79A
9	ENSG00000105499	PLA2G4C
9	ENSG00000105509	HAS1
9	ENSG00000105639	JAK3
9	ENSG00000106328	FSCN3
9	ENSG00000106366	SERPINE1
9	ENSG00000106948	AKNA
9	ENSG00000106952	TNFSF8
9	ENSG00000107201	RIGI
9	ENSG00000107738	VSIR
9	ENSG00000108106	UBE2S
9	ENSG00000108556	CHRNE
9	ENSG00000108688	CCL7
9	ENSG00000108691	CCL2
9	ENSG00000108700	CCL8
9	ENSG00000108786	HSD17B1
9	ENSG00000109047	RCVRN
9	ENSG00000109107	ALDOC
9	ENSG00000109321	AREG
9	ENSG00000110080	ST3GAL4
9	ENSG00000110324	IL10RA
9	ENSG00000110660	SLC35F2
9	ENSG00000111331	OAS3
9	ENSG00000111335	OAS2
9	ENSG00000111490	TBC1D30
9	ENSG00000111537	IFNG
9	ENSG00000111886	GABRR2
9	ENSG00000111913	RIPOR2
9	ENSG00000111981	ULBP1
9	ENSG00000112139	MDGA1
9	ENSG00000113303	BTNL8
9	ENSG00000113721	PDGFRB
9	ENSG00000113749	HRH2
9	ENSG00000114737	CISH
9	ENSG00000115415	STAT1
9	ENSG00000115604	IL18R1
9	ENSG00000116017	ARID3A
9	ENSG00000116147	TNR
9	ENSG00000116544	DLGAP3
9	ENSG00000116741	RGS2
9	ENSG00000117322	CR2
9	ENSG00000118160	SLC8A2
9	ENSG00000118432	CNR1
9	ENSG00000118508	RAB32
9	ENSG00000118514	ALDH8A1
9	ENSG00000118785	SPP1
9	ENSG00000119917	IFIT3
9	ENSG00000119922	IFIT2
9	ENSG00000120129	DUSP1
9	ENSG00000120318	ARAP3
9	ENSG00000120949	TNFRSF8
9	ENSG00000121297	TSHZ3
9	ENSG00000121742	GJB6
9	ENSG00000121858	TNFSF10
9	ENSG00000122432	SPATA1
9	ENSG00000122691	TWIST1
9	ENSG00000123405	NFE2
9	ENSG00000123975	CKS2
9	ENSG00000124216	SNAI1
9	ENSG00000124256	ZBP1
9	ENSG00000124257	NEURL2
9	ENSG00000124731	TREM1
9	ENSG00000125144	MT1G
9	ENSG00000125148	MT2A
9	ENSG00000125384	PTGER2
9	ENSG00000125657	TNFSF9
9	ENSG00000125810	CD93
9	ENSG00000125845	BMP2
9	ENSG00000127311	HELB
9	ENSG00000127507	ADGRE2
9	ENSG00000128253	RFPL2
9	ENSG00000128284	APOL3
9	ENSG00000128335	APOL2
9	ENSG00000128482	RNF112
9	ENSG00000129355	CDKN2D
9	ENSG00000129467	ADCY4
9	ENSG00000129646	QRICH2
9	ENSG00000129657	SEC14L1
9	ENSG00000129993	CBFA2T3
9	ENSG00000130300	PLVAP
9	ENSG00000130589	HELZ2
9	ENSG00000130783	CCDC62
9	ENSG00000131042	LILRB2
9	ENSG00000131203	IDO1
9	ENSG00000131873	CHSY1
9	ENSG00000132185	FCRLA
9	ENSG00000132465	JCHAIN
9	ENSG00000132530	XAF1
9	ENSG00000133106	EPSTI1
9	ENSG00000134007	ADAM20
9	ENSG00000134013	LOXL2
9	ENSG00000134285	FKBP11
9	ENSG00000134321	RSAD2
9	ENSG00000134326	CMPK2
9	ENSG00000134460	IL2RA
9	ENSG00000134470	IL15RA
9	ENSG00000134531	EMP1
9	ENSG00000134602	STK26
9	ENSG00000135083	CCNJL
9	ENSG00000135114	OASL
9	ENSG00000135148	TRAFD1
9	ENSG00000135245	HILPDA
9	ENSG00000135365	PHF21A
9	ENSG00000135437	RDH5
9	ENSG00000135899	SP110
9	ENSG00000136250	AOAH
9	ENSG00000136999	CCN3
9	ENSG00000137193	PIM1
9	ENSG00000137441	FGFBP2
9	ENSG00000137571	SLCO5A1
9	ENSG00000137642	SORL1
9	ENSG00000137959	IFI44L
9	ENSG00000137965	IFI44
9	ENSG00000138031	ADCY3
9	ENSG00000138496	PARP9
9	ENSG00000138623	SEMA7A
9	ENSG00000138646	HERC5
9	ENSG00000138678	GPAT3
9	ENSG00000138755	CXCL9
9	ENSG00000138821	SLC39A8
9	ENSG00000138829	FBN2
9	ENSG00000139190	VAMP1
9	ENSG00000139737	SLAIN1
9	ENSG00000139908	TSSK4
9	ENSG00000139946	PELI2
9	ENSG00000140105	WARS1
9	ENSG00000140274	DUOXA2
9	ENSG00000140488	CELF6
9	ENSG00000140511	HAPLN3
9	ENSG00000140564	FURIN
9	ENSG00000140932	CMTM2
9	ENSG00000141837	CACNA1A
9	ENSG00000142102	PGGHG
9	ENSG00000142512	SIGLEC10
9	ENSG00000142599	RERE
9	ENSG00000142694	EVA1B
9	ENSG00000143226	FCGR2A
9	ENSG00000143297	FCRL5
9	ENSG00000143552	NUP210L
9	ENSG00000143847	PPFIA4
9	ENSG00000143851	PTPN7
9	ENSG00000144130	NT5DC4
9	ENSG00000144671	SLC22A14
9	ENSG00000144893	MED12L
9	ENSG00000145107	TM4SF19
9	ENSG00000145244	CORIN
9	ENSG00000145335	SNCA
9	ENSG00000145860	RNF145
9	ENSG00000146281	PM20D2
9	ENSG00000146530	VWDE
9	ENSG00000146592	CREB5
9	ENSG00000147010	SH3KBP1
9	ENSG00000147408	CSGALNACT1
9	ENSG00000147454	SLC25A37
9	ENSG00000148734	NPFFR1
9	ENSG00000149269	PAK1
9	ENSG00000149403	GRIK4
9	ENSG00000149634	SPATA25
9	ENSG00000149798	CDC42EP2
9	ENSG00000150048	CLEC1A
9	ENSG00000150337	FCGR1A
9	ENSG00000150347	ARID5B
9	ENSG00000150681	RGS18
9	ENSG00000151692	RNF144A
9	ENSG00000151883	PARP8
9	ENSG00000152192	POU4F1
9	ENSG00000152766	ANKRD22
9	ENSG00000152784	PRDM8
9	ENSG00000153162	BMP6
9	ENSG00000153253	SCN3A
9	ENSG00000154529	CNTNAP3B
9	ENSG00000154642	C21orf91
9	ENSG00000156587	UBE2L6
9	ENSG00000156738	MS4A1
9	ENSG00000157152	SYN2
9	ENSG00000157514	TSC22D3
9	ENSG00000157601	MX1
9	ENSG00000158859	ADAMTS4
9	ENSG00000158869	FCER1G
9	ENSG00000159958	TNFRSF13C
9	ENSG00000160013	PTGIR
9	ENSG00000160117	ANKLE1
9	ENSG00000160223	ICOSLG
9	ENSG00000160326	SLC2A6
9	ENSG00000160471	COX6B2
9	ENSG00000160999	SH2B2
9	ENSG00000161180	CCDC116
9	ENSG00000161682	FAM171A2
9	ENSG00000161835	TAMALIN
9	ENSG00000161958	FGF11
9	ENSG00000162490	DRAXIN
9	ENSG00000162711	NLRP3
9	ENSG00000162722	TRIM58
9	ENSG00000163293	NIPAL1
9	ENSG00000163297	ANTXR2
9	ENSG00000163412	EIF4E3
9	ENSG00000163421	PROK2
9	ENSG00000163464	CXCR1
9	ENSG00000163518	FCRL4
9	ENSG00000163545	NUAK2
9	ENSG00000163565	IFI16
9	ENSG00000163568	AIM2
9	ENSG00000163803	PLB1
9	ENSG00000163806	SPDYA
9	ENSG00000163958	ZDHHC19
9	ENSG00000164304	CAGE1
9	ENSG00000164330	EBF1
9	ENSG00000164509	IL31RA
9	ENSG00000164692	COL1A2
9	ENSG00000164949	GEM
9	ENSG00000165071	TMEM71
9	ENSG00000165410	CFL2
9	ENSG00000165801	ARHGEF40
9	ENSG00000165917	RAPSN
9	ENSG00000166016	ABTB2
9	ENSG00000166311	SMPD1
9	ENSG00000166396	SERPINB7
9	ENSG00000166501	PRKCB
9	ENSG00000166707	ZCCHC18
9	ENSG00000166947	EPB42
9	ENSG00000167536	DHRS13
9	ENSG00000167550	RHEBL1
9	ENSG00000167676	PLIN4
9	ENSG00000167703	SLC43A2
9	ENSG00000167772	ANGPTL4
9	ENSG00000168016	TRANK1
9	ENSG00000168329	CX3CR1
9	ENSG00000168334	XIRP1
9	ENSG00000168477	TNXB
9	ENSG00000168542	COL3A1
9	ENSG00000168874	ATOH8
9	ENSG00000168913	ENHO
9	ENSG00000169031	COL4A3
9	ENSG00000169136	ATF5
9	ENSG00000169184	MN1
9	ENSG00000169194	IL13
9	ENSG00000169203	NPIPB12
9	ENSG00000169245	CXCL10
9	ENSG00000169246	NPIPB3
9	ENSG00000169248	CXCL11
9	ENSG00000169509	CRCT1
9	ENSG00000170345	FOS
9	ENSG00000170379	TCAF2
9	ENSG00000170476	MZB1
9	ENSG00000170837	GPR27
9	ENSG00000171174	RBKS
9	ENSG00000171236	LRG1
9	ENSG00000171777	RASGRP4
9	ENSG00000172159	FRMD3
9	ENSG00000172247	C1QTNF4
9	ENSG00000172803	SNX32
9	ENSG00000172940	SLC22A13
9	ENSG00000173193	PARP14
9	ENSG00000173212	MAB21L3
9	ENSG00000173281	PPP1R3B
9	ENSG00000173535	TNFRSF10C
9	ENSG00000173597	SULT1B1
9	ENSG00000173821	RNF213
9	ENSG00000173825	TIGD3
9	ENSG00000173868	PHOSPHO1
9	ENSG00000173991	TCAP
9	ENSG00000174123	TLR10
9	ENSG00000174885	NLRP6
9	ENSG00000175040	CHST2
9	ENSG00000175518	UBQLNL
9	ENSG00000175643	RMI2
9	ENSG00000175857	GAPT
9	ENSG00000175985	PLEKHD1
9	ENSG00000176076	KCNE5
9	ENSG00000177294	FBXO39
9	ENSG00000177409	SAMD9L
9	ENSG00000177455	CD19
9	ENSG00000177469	CAVIN1
9	ENSG00000177494	ZBED2
9	ENSG00000177721	ANXA2R
9	ENSG00000178026	LRRC75B
9	ENSG00000178445	GLDC
9	ENSG00000178607	ERN1
9	ENSG00000178789	CD300LB
9	ENSG00000178860	MSC
9	ENSG00000179094	PER1
9	ENSG00000179165	PXT1
9	ENSG00000179750	APOBEC3B
9	ENSG00000180448	ARHGAP45
9	ENSG00000180549	FUT7
9	ENSG00000180616	SSTR2
9	ENSG00000180871	CXCR2
9	ENSG00000181577	LINC03040
9	ENSG00000181616	OR52H1
9	ENSG00000181788	SIAH2
9	ENSG00000181963	OR52K2
9	ENSG00000182600	SNORC
9	ENSG00000182871	COL18A1
9	ENSG00000183153	GJD3
9	ENSG00000183160	TMEM119
9	ENSG00000183260	ABHD16B
9	ENSG00000183484	GPR132
9	ENSG00000183486	MX2
9	ENSG00000183625	CCR3
9	ENSG00000183638	RP1L1
9	ENSG00000184005	ST6GALNAC3
9	ENSG00000184492	FOXD4L1
9	ENSG00000184716	SERINC4
9	ENSG00000184979	USP18
9	ENSG00000184985	SORCS2
9	ENSG00000185112	FAM43A
9	ENSG00000185271	KLHL33
9	ENSG00000185291	IL3RA
9	ENSG00000185304	RGPD2
9	ENSG00000185507	IRF7
9	ENSG00000185633	NDUFA4L2
9	ENSG00000185650	ZFP36L1
9	ENSG00000185664	PMEL
9	ENSG00000185745	IFIT1
9	ENSG00000185864	NPIPB4
9	ENSG00000186407	CD300E
9	ENSG00000186907	RTN4RL2
9	ENSG00000187045	TMPRSS6
9	ENSG00000187116	LILRA5
9	ENSG00000187144	SPATA21
9	ENSG00000187193	MT1X
9	ENSG00000187608	ISG15
9	ENSG00000187627	RGPD1
9	ENSG00000187912	CLEC17A
9	ENSG00000188305	PEAK3
9	ENSG00000188394	GPR21
9	ENSG00000188536	HBA2
9	ENSG00000188676	IDO2
9	ENSG00000189269	DRICH1
9	ENSG00000196083	IL1RAP
9	ENSG00000196092	PAX5
9	ENSG00000196296	ATP2A1
9	ENSG00000196329	GIMAP5
9	ENSG00000196684	HSH2D
9	ENSG00000196778	OR52K1
9	ENSG00000197272	IL27
9	ENSG00000197992	CLEC9A
9	ENSG00000198417	MT1F
9	ENSG00000198576	ARC
9	ENSG00000198754	OXCT2
9	ENSG00000203710	CR1
9	ENSG00000204020	LIPN
9	ENSG00000204086	RPA4
9	ENSG00000204131	NHSL2
9	ENSG00000204248	COL11A2
9	ENSG00000204264	PSMB8
9	ENSG00000204267	TAP2
9	ENSG00000204305	AGER
9	ENSG00000204525	HLA-C
9	ENSG00000204531	POU5F1
9	ENSG00000204632	HLA-G
9	ENSG00000204681	GABBR1
9	ENSG00000205358	MT1H
9	ENSG00000205364	MT1M
9	ENSG00000205413	SAMD9
9	ENSG00000205420	KRT6A
9	ENSG00000205702	CYP2D7
9	ENSG00000205710	C17orf107
9	ENSG00000205755	CRLF2
9	ENSG00000205927	OLIG2
9	ENSG00000206172	HBA1
9	ENSG00000206503	HLA-A
9	ENSG00000211592	IGKC
9	ENSG00000211598	IGKV4-1
9	ENSG00000211644	IGLV1-51
9	ENSG00000211648	IGLV1-47
9	ENSG00000211651	IGLV1-44
9	ENSG00000211660	IGLV2-23
9	ENSG00000211666	IGLV2-14
9	ENSG00000211668	IGLV2-11
9	ENSG00000211675	IGLC1
9	ENSG00000211677	IGLC2
9	ENSG00000211689	TRGC1
9	ENSG00000211697	TRGV5
9	ENSG00000211890	IGHA2
9	ENSG00000211893	IGHG2
9	ENSG00000211895	IGHA1
9	ENSG00000211899	IGHM
9	ENSG00000211938	IGHV3-7
9	ENSG00000211943	IGHV3-15
9	ENSG00000211945	IGHV1-18
9	ENSG00000211947	IGHV3-21
9	ENSG00000211949	IGHV3-23
9	ENSG00000211955	IGHV3-33
9	ENSG00000211956	IGHV4-34
9	ENSG00000211965	IGHV3-49
9	ENSG00000211966	IGHV5-51
9	ENSG00000213445	SIPA1
9	ENSG00000213512	GBP7
9	ENSG00000213999	MEF2B
9	ENSG00000214212	C19orf38
9	ENSG00000214226	C17orf67
9	ENSG00000214435	AS3MT
9	ENSG00000214456	PLIN5
9	ENSG00000215529	EFCAB8
9	ENSG00000221869	CEBPD
9	ENSG00000221963	APOL6
9	ENSG00000221970	OR2A1
9	ENSG00000224650	IGHV3-74
9	ENSG00000226979	LTA
9	ENSG00000231256	CFAP97D1
9	ENSG00000231852	CYP21A2
9	ENSG00000235568	NFAM1
9	ENSG00000235750	KIAA0040
9	ENSG00000237988	OR2I1P
9	ENSG00000239605	STPG4
9	ENSG00000239732	TLR9
9	ENSG00000239951	IGKV3-20
9	ENSG00000239998	LILRA2
9	ENSG00000240065	PSMB9
9	ENSG00000240505	TNFRSF13B
9	ENSG00000241106	HLA-DOB
9	ENSG00000243466	IGKV1-5
9	ENSG00000243716	NPIPB5
9	ENSG00000244116	IGKV2-28
9	ENSG00000244437	IGKV3-15
9	ENSG00000244682	FCGR2C
9	ENSG00000244734	HBB
9	ENSG00000248483	POU5F2
9	ENSG00000249240
9	ENSG00000250138
9	ENSG00000250254	PTTG2
9	ENSG00000250264
9	ENSG00000251158
9	ENSG00000251503	CENPS-CORT
9	ENSG00000251546	IGKV1D-39
9	ENSG00000254413	CHKB-CPT1B
9	ENSG00000254415	SIGLEC14
9	ENSG00000254709	IGLL5
9	ENSG00000254788	CKLF-CMTM1
9	ENSG00000254995	STX16-NPEPL1
9	ENSG00000255974	CYP2A6
9	ENSG00000256660	CLEC12B
9	ENSG00000258311
9	ENSG00000259371
9	ENSG00000261308	FIGNL2
9	ENSG00000261582
9	ENSG00000261832
9	ENSG00000263155	MYZAP
9	ENSG00000264187
9	ENSG00000264343	NOTCH2NLA
9	ENSG00000266338	NBPF15
9	ENSG00000267385
9	ENSG00000269720	CCDC194
9	ENSG00000270106	TSNAX-DISC1
9	ENSG00000270231	NBPF8
9	ENSG00000270629	NBPF14
9	ENSG00000270885	RASL10B
9	ENSG00000271425	NBPF10
9	ENSG00000272899	ATP6V1FNB
9	ENSG00000273604	EPOP
9	ENSG00000274322
9	ENSG00000274512	TBC1D3L
9	ENSG00000274808	TBC1D3B
9	ENSG00000278196	IGLV2-8
9	ENSG00000281106	TMEM272
9	ENSG00000281883
9	ENSG00000284194	SCO2
9	ENSG00000285171
9	ENSG00000285708
9	ENSG00000285816
2	ENSG00000000938	FGR
2	ENSG00000003402	CFLAR
2	ENSG00000004864	SLC25A13
2	ENSG00000006652	IFRD1
2	ENSG00000007237	GAS7
2	ENSG00000007350	TKTL1
2	ENSG00000007944	MYLIP
2	ENSG00000008118	CAMK1G
2	ENSG00000008130	NADK
2	ENSG00000008294	SPAG9
2	ENSG00000008438	PGLYRP1
2	ENSG00000008516	MMP25
2	ENSG00000009694	TENM1
2	ENSG00000010030	ETV7
2	ENSG00000010539	ZNF200
2	ENSG00000010818	HIVEP2
2	ENSG00000011132	APBA3
2	ENSG00000011422	PLAUR
2	ENSG00000012124	CD22
2	ENSG00000015475	BID
2	ENSG00000022567	SLC45A4
2	ENSG00000023608	SNAPC1
2	ENSG00000026103	FAS
2	ENSG00000026751	SLAMF7
2	ENSG00000028137	TNFRSF1B
2	ENSG00000034152	MAP2K3
2	ENSG00000042832	TG
2	ENSG00000043462	LCP2
2	ENSG00000047365	ARAP2
2	ENSG00000049249	TNFRSF9
2	ENSG00000052795	FNIP2
2	ENSG00000053108	FSTL4
2	ENSG00000054267	ARID4B
2	ENSG00000056558	TRAF1
2	ENSG00000057657	PRDM1
2	ENSG00000059728	MXD1
2	ENSG00000059804	SLC2A3
2	ENSG00000062194	GPBP1
2	ENSG00000063015	SEZ6
2	ENSG00000064547	LPAR2
2	ENSG00000064932	SBNO2
2	ENSG00000067064	IDI1
2	ENSG00000067082	KLF6
2	ENSG00000067798	NAV3
2	ENSG00000068323	TFE3
2	ENSG00000068383	INPP5A
2	ENSG00000068976	PYGM
2	ENSG00000069399	BCL3
2	ENSG00000070190	DAPP1
2	ENSG00000070495	JMJD6
2	ENSG00000071054	MAP4K4
2	ENSG00000072401	UBE2D1
2	ENSG00000073756	PTGS2
2	ENSG00000074660	SCARF1
2	ENSG00000075151	EIF4G3
2	ENSG00000075399	VPS9D1
2	ENSG00000075420	FNDC3B
2	ENSG00000075426	FOSL2
2	ENSG00000077150	NFKB2
2	ENSG00000077984	CST7
2	ENSG00000078098	FAP
2	ENSG00000078269	SYNJ2
2	ENSG00000078401	EDN1
2	ENSG00000078804	TP53INP2
2	ENSG00000079385	CEACAM1
2	ENSG00000079393	DUSP13
2	ENSG00000080371	RAB21
2	ENSG00000081041	CXCL2
2	ENSG00000082014	SMARCD3
2	ENSG00000082074	FYB1
2	ENSG00000086288	NME8
2	ENSG00000087074	PPP1R15A
2	ENSG00000087157	PGS1
2	ENSG00000087303	NID2
2	ENSG00000089351	GRAMD1A
2	ENSG00000089558	KCNH4
2	ENSG00000090339	ICAM1
2	ENSG00000090376	IRAK3
2	ENSG00000090924	PLEKHG2
2	ENSG00000091972	CD200
2	ENSG00000092421	SEMA6A
2	ENSG00000095794	CREM
2	ENSG00000095951	HIVEP1
2	ENSG00000099860	GADD45B
2	ENSG00000099985	OSM
2	ENSG00000099998	GGT5
2	ENSG00000100024	UPB1
2	ENSG00000100031	GGT1
2	ENSG00000100055	CYTH4
2	ENSG00000100226	GTPBP1
2	ENSG00000100284	TOM1
2	ENSG00000100368	CSF2RB
2	ENSG00000100644	HIF1A
2	ENSG00000100647	SUSD6
2	ENSG00000100906	NFKBIA
2	ENSG00000100918	REC8
2	ENSG00000100985	MMP9
2	ENSG00000101104	PABPC1L
2	ENSG00000101187	SLCO4A1
2	ENSG00000101188	NTSR1
2	ENSG00000101190	TCFL5
2	ENSG00000101236	RNF24
2	ENSG00000101255	TRIB3
2	ENSG00000101265	RASSF2
2	ENSG00000101294	HM13
2	ENSG00000101331	CCM2L
2	ENSG00000101384	JAG1
2	ENSG00000101425	BPI
2	ENSG00000101460	MAP1LC3A
2	ENSG00000101596	SMCHD1
2	ENSG00000101745	ANKRD12
2	ENSG00000102010	BMX
2	ENSG00000102057	KCND1
2	ENSG00000102096	PIM2
2	ENSG00000102393	GLA
2	ENSG00000102543	CDADC1
2	ENSG00000102794	ACOD1
2	ENSG00000102897	LYRM1
2	ENSG00000102908	NFAT5
2	ENSG00000102921	N4BP1
2	ENSG00000103196	CRISPLD2
2	ENSG00000103249	CLCN7
2	ENSG00000103257	SLC7A5
2	ENSG00000103313	MEFV
2	ENSG00000103569	AQP9
2	ENSG00000104312	RIPK2
2	ENSG00000104320	NBN
2	ENSG00000104419	NDRG1
2	ENSG00000104856	RELB
2	ENSG00000104885	DOT1L
2	ENSG00000105246	EBI3
2	ENSG00000105321	CCDC9
2	ENSG00000105339	DENND3
2	ENSG00000105352	CEACAM4
2	ENSG00000105371	ICAM4
2	ENSG00000105376	ICAM5
2	ENSG00000105402	NAPA
2	ENSG00000105520	PLPPR2
2	ENSG00000105642	KCNN1
2	ENSG00000105656	ELL
2	ENSG00000105707	HPN
2	ENSG00000105711	SCN1B
2	ENSG00000105835	NAMPT
2	ENSG00000106462	EZH2
2	ENSG00000107736	CDH23
2	ENSG00000107968	MAP3K8
2	ENSG00000108179	PPIF
2	ENSG00000108582	CPD
2	ENSG00000109046	WSB1
2	ENSG00000109320	NFKB1
2	ENSG00000109674	NEIL3
2	ENSG00000110046	ATG2A
2	ENSG00000110047	EHD1
2	ENSG00000110848	CD69
2	ENSG00000110852	CLEC2B
2	ENSG00000110931	CAMKK2
2	ENSG00000111266	DUSP16
2	ENSG00000111729	CLEC4A
2	ENSG00000111817	DSE
2	ENSG00000111859	NEDD9
2	ENSG00000112053	SLC26A8
2	ENSG00000112137	PHACTR1
2	ENSG00000112149	CD83
2	ENSG00000112195	TREML2
2	ENSG00000112242	E2F3
2	ENSG00000112299	VNN1
2	ENSG00000112303	VNN2
2	ENSG00000112715	VEGFA
2	ENSG00000112851	ERBIN
2	ENSG00000113073	SLC4A9
2	ENSG00000113368	LMNB1
2	ENSG00000113389	NPR3
2	ENSG00000113758	DBN1
2	ENSG00000113916	BCL6
2	ENSG00000114127	XRN1
2	ENSG00000114480	GBE1
2	ENSG00000114626	ABTB1
2	ENSG00000115008	IL1A
2	ENSG00000115009	CCL20
2	ENSG00000115165	CYTIP
2	ENSG00000115267	IFIH1
2	ENSG00000115297	TLX2
2	ENSG00000115590	IL1R2
2	ENSG00000115594	IL1R1
2	ENSG00000115607	IL18RAP
2	ENSG00000115828	QPCT
2	ENSG00000115956	PLEK
2	ENSG00000116514	RNF19B
2	ENSG00000116679	IVNS1ABP
2	ENSG00000116954	RRAGC
2	ENSG00000117000	RLF
2	ENSG00000117090	SLAMF1
2	ENSG00000117091	CD48
2	ENSG00000117115	PADI2
2	ENSG00000117226	GBP3
2	ENSG00000117228	GBP1
2	ENSG00000117298	ECE1
2	ENSG00000118113	MMP8
2	ENSG00000118503	TNFAIP3
2	ENSG00000118515	SGK1
2	ENSG00000119048	UBE2B
2	ENSG00000119121	TRPM6
2	ENSG00000119403	PHF19
2	ENSG00000119508	NR4A3
2	ENSG00000119535	CSF3R
2	ENSG00000120063	GNA13
2	ENSG00000120217	CD274
2	ENSG00000120306	CYSTM1
2	ENSG00000120329	SLC25A2
2	ENSG00000121060	TRIM25
2	ENSG00000121577	POPDC2
2	ENSG00000121797	CCRL2
2	ENSG00000121966	CXCR4
2	ENSG00000122861	PLAU
2	ENSG00000122862	SRGN
2	ENSG00000123213	NLN
2	ENSG00000123329	ARHGAP9
2	ENSG00000123610	TNFAIP6
2	ENSG00000123689	G0S2
2	ENSG00000123700	KCNJ2
2	ENSG00000123838	C4BPA
2	ENSG00000124102	PI3
2	ENSG00000124103	FAM209A
2	ENSG00000124120	TTPAL
2	ENSG00000124126	PREX1
2	ENSG00000124134	KCNS1
2	ENSG00000124391	IL17C
2	ENSG00000124762	CDKN1A
2	ENSG00000124772	CPNE5
2	ENSG00000125347	IRF1
2	ENSG00000125430	HS3ST3B1
2	ENSG00000125505	MBOAT7
2	ENSG00000125538	IL1B
2	ENSG00000125731	SH2D3A
2	ENSG00000125735	TNFSF14
2	ENSG00000125740	FOSB
2	ENSG00000126251	GPR42
2	ENSG00000126262	FFAR2
2	ENSG00000126266	FFAR1
2	ENSG00000126368	NR1D1
2	ENSG00000126759	CFP
2	ENSG00000127084	FGD3
2	ENSG00000127528	KLF2
2	ENSG00000127666	TICAM1
2	ENSG00000127946	HIP1
2	ENSG00000127954	STEAP4
2	ENSG00000128011	LRFN1
2	ENSG00000128016	ZFP36
2	ENSG00000128271	ADORA2A
2	ENSG00000128383	APOBEC3A
2	ENSG00000128512	DOCK4
2	ENSG00000128564	VGF
2	ENSG00000128917	DLL4
2	ENSG00000129292	PHF20L1
2	ENSG00000129667	RHBDF2
2	ENSG00000129682	FGF13
2	ENSG00000129749	CHRNA10
2	ENSG00000130052	STARD8
2	ENSG00000130066	SAT1
2	ENSG00000130368	MAS1
2	ENSG00000130592	LSP1
2	ENSG00000130768	SMPDL3B
2	ENSG00000131323	TRAF3
2	ENSG00000131379	C3orf20
2	ENSG00000131480	AOC2
2	ENSG00000131669	NINJ1
2	ENSG00000131979	GCH1
2	ENSG00000132002	DNAJB1
2	ENSG00000132003	ZSWIM4
2	ENSG00000132334	PTPRE
2	ENSG00000132475	H3-3B
2	ENSG00000132510	KDM6B
2	ENSG00000133048	CHI3L1
2	ENSG00000133055	MYBPH
2	ENSG00000133805	AMPD3
2	ENSG00000134070	IRAK2
2	ENSG00000134107	BHLHE40
2	ENSG00000134152	KATNBL1
2	ENSG00000134571	MYBPC3
2	ENSG00000134802	SLC43A3
2	ENSG00000134871	COL4A2
2	ENSG00000135124	P2RX4
2	ENSG00000135362	PRR5L
2	ENSG00000135424	ITGA7
2	ENSG00000135436	FAM186B
2	ENSG00000135604	STX11
2	ENSG00000135625	EGR4
2	ENSG00000135636	DYSF
2	ENSG00000135655	USP15
2	ENSG00000135740	SLC9A5
2	ENSG00000135842	NIBAN1
2	ENSG00000136026	CKAP4
2	ENSG00000136040	PLXNC1
2	ENSG00000136371	MTHFS
2	ENSG00000136560	TANK
2	ENSG00000136630	HLX
2	ENSG00000136688	IL36G
2	ENSG00000136689	IL1RN
2	ENSG00000136869	TLR4
2	ENSG00000137312	FLOT1
2	ENSG00000137331	IER3
2	ENSG00000137393	RNF144B
2	ENSG00000137462	TLR2
2	ENSG00000137496	IL18BP
2	ENSG00000137507	LRRC32
2	ENSG00000137752	CASP1
2	ENSG00000137757	CASP5
2	ENSG00000138166	DUSP5
2	ENSG00000138378	STAT4
2	ENSG00000138433	CIR1
2	ENSG00000138621	PPCDC
2	ENSG00000138772	ANXA3
2	ENSG00000139318	DUSP6
2	ENSG00000139370	SLC15A4
2	ENSG00000139572	GPR84
2	ENSG00000139832	RAB20
2	ENSG00000139890	REM2
2	ENSG00000139914	FITM1
2	ENSG00000139973	SYT16
2	ENSG00000140030	GPR65
2	ENSG00000140332	TLE3
2	ENSG00000140379	BCL2A1
2	ENSG00000140464	PML
2	ENSG00000140563	MCTP2
2	ENSG00000140678	ITGAX
2	ENSG00000140749	IGSF6
2	ENSG00000140853	NLRC5
2	ENSG00000140859	KIFC3
2	ENSG00000140941	MAP1LC3B
2	ENSG00000140961	OSGIN1
2	ENSG00000141086	CTRL
2	ENSG00000141506	PIK3R5
2	ENSG00000141526	SLC16A3
2	ENSG00000141574	SECTM1
2	ENSG00000141682	PMAIP1
2	ENSG00000142089	IFITM3
2	ENSG00000142185	TRPM2
2	ENSG00000143119	CD53
2	ENSG00000143341	HMCN1
2	ENSG00000143452	HORMAD1
2	ENSG00000143546	S100A8
2	ENSG00000144136	SLC20A1
2	ENSG00000144655	CSRNP1
2	ENSG00000144802	NFKBIZ
2	ENSG00000145365	TIFA
2	ENSG00000145819	ARHGAP26
2	ENSG00000145901	TNIP1
2	ENSG00000145979	TBC1D7
2	ENSG00000146112	PPP1R18
2	ENSG00000146232	NFKBIE
2	ENSG00000146278	PNRC1
2	ENSG00000146457	WTAP
2	ENSG00000146859	TMEM140
2	ENSG00000147119	CHST7
2	ENSG00000147168	IL2RG
2	ENSG00000147416	ATP6V1B2
2	ENSG00000147459	DOCK5
2	ENSG00000147894	C9orf72
2	ENSG00000148200	NR6A1
2	ENSG00000148516	ZEB1
2	ENSG00000148841	ITPRIP
2	ENSG00000148926	ADM
2	ENSG00000149289	ZC3H12C
2	ENSG00000150977	RILPL2
2	ENSG00000151012	SLC7A11
2	ENSG00000151014	NOCT
2	ENSG00000151151	IPMK
2	ENSG00000151466	SCLT1
2	ENSG00000151651	ADAM8
2	ENSG00000151726	ACSL1
2	ENSG00000151743	AMN1
2	ENSG00000151948	GLT1D1
2	ENSG00000152056	AP1S3
2	ENSG00000152223	EPG5
2	ENSG00000152229	PSTPIP2
2	ENSG00000152256	PDK1
2	ENSG00000152926	ZNF117
2	ENSG00000153310	CYRIB
2	ENSG00000153395	LPCAT1
2	ENSG00000153922	CHD1
2	ENSG00000153976	HS3ST3A1
2	ENSG00000154359	LONRF1
2	ENSG00000154451	GBP5
2	ENSG00000154589	LY96
2	ENSG00000154710	RABGEF1
2	ENSG00000154803	FLCN
2	ENSG00000154928	EPHB1
2	ENSG00000155090	KLF10
2	ENSG00000155099	PIP4P2
2	ENSG00000155307	SAMSN1
2	ENSG00000155629	PIK3AP1
2	ENSG00000155966	AFF2
2	ENSG00000156127	BATF
2	ENSG00000156860	FBRS
2	ENSG00000156886	ITGAD
2	ENSG00000157017	GHRL
2	ENSG00000157322	CLEC18A
2	ENSG00000157335	CLEC18C
2	ENSG00000157551	KCNJ15
2	ENSG00000157557	ETS2
2	ENSG00000157764	BRAF
2	ENSG00000157870	PRXL2B
2	ENSG00000157873	TNFRSF14
2	ENSG00000158050	DUSP2
2	ENSG00000158089	GALNT14
2	ENSG00000158411	MITD1
2	ENSG00000158470	B4GALT5
2	ENSG00000158517	NCF1
2	ENSG00000158615	PPP1R15B
2	ENSG00000158792	SPATA2L
2	ENSG00000158805	ZNF276
2	ENSG00000158825	CDA
2	ENSG00000158882	TOMM40L
2	ENSG00000158887	MPZ
2	ENSG00000159128	IFNGR2
2	ENSG00000159289	GOLGA6A
2	ENSG00000159339	PADI4
2	ENSG00000159388	BTG2
2	ENSG00000159496	RGL4
2	ENSG00000160201	U2AF1
2	ENSG00000160271	RALGDS
2	ENSG00000160584	SIK3
2	ENSG00000160712	IL6R
2	ENSG00000160796	NBEAL2
2	ENSG00000160888	IER2
2	ENSG00000161011	SQSTM1
2	ENSG00000161040	FBXL13
2	ENSG00000161939	RNASEK-C17orf49
2	ENSG00000162066	AMDHD2
2	ENSG00000162144	CYB561A3
2	ENSG00000162407	PLPP3
2	ENSG00000162413	KLHL21
2	ENSG00000162433	AK4
2	ENSG00000162438	CTRC
2	ENSG00000162461	SLC25A34
2	ENSG00000162551	ALPL
2	ENSG00000162645	GBP2
2	ENSG00000162654	GBP4
2	ENSG00000162747	FCGR3B
2	ENSG00000162771	GARIN4
2	ENSG00000162772	ATF3
2	ENSG00000162783	IER5
2	ENSG00000163082	SGPP2
2	ENSG00000163121	NEURL3
2	ENSG00000163220	S100A9
2	ENSG00000163221	S100A12
2	ENSG00000163660	CCNL1
2	ENSG00000163739	CXCL1
2	ENSG00000163746	PLSCR2
2	ENSG00000163823	CCR1
2	ENSG00000163870	TPRA1
2	ENSG00000163874	ZC3H12A
2	ENSG00000163923	RPL39L
2	ENSG00000163975	MELTF
2	ENSG00000164236	ANKRD33B
2	ENSG00000164266	SPINK1
2	ENSG00000164400	CSF2
2	ENSG00000164463	CREBRF
2	ENSG00000164626	KCNK5
2	ENSG00000164691	TAGAP
2	ENSG00000164715	LMTK2
2	ENSG00000164929	BAALC
2	ENSG00000165030	NFIL3
2	ENSG00000165233	CARD19
2	ENSG00000165997	ARL5B
2	ENSG00000166128	RAB8B
2	ENSG00000166523	CLEC4E
2	ENSG00000166527	CLEC4D
2	ENSG00000166839	ANKDD1A
2	ENSG00000166889	PATL1
2	ENSG00000166900	STX3
2	ENSG00000166920	C15orf48
2	ENSG00000167100	SAMD14
2	ENSG00000167173	C15orf39
2	ENSG00000167207	NOD2
2	ENSG00000167208	SNX20
2	ENSG00000167434	CA4
2	ENSG00000167604	NFKBID
2	ENSG00000167612	ANKRD33
2	ENSG00000167851	CD300A
2	ENSG00000167874	TMEM88
2	ENSG00000167992	VWCE
2	ENSG00000167994	RAB3IL1
2	ENSG00000167995	BEST1
2	ENSG00000168062	BATF2
2	ENSG00000168071	CCDC88B
2	ENSG00000168209	DDIT4
2	ENSG00000168389	MFSD2A
2	ENSG00000168394	TAP1
2	ENSG00000168421	RHOH
2	ENSG00000168779	SHOX2
2	ENSG00000169180	XPO6
2	ENSG00000169228	RAB24
2	ENSG00000169403	PTAFR
2	ENSG00000169429	CXCL8
2	ENSG00000169891	REPS2
2	ENSG00000170006	TMEM154
2	ENSG00000170091	NSG2
2	ENSG00000170458	CD14
2	ENSG00000170525	PFKFB3
2	ENSG00000170542	SERPINB9
2	ENSG00000170956	CEACAM3
2	ENSG00000171049	FPR2
2	ENSG00000171051	FPR1
2	ENSG00000171223	JUNB
2	ENSG00000171522	PTGER4
2	ENSG00000171786	NHLH1
2	ENSG00000171860	C3AR1
2	ENSG00000172183	ISG20
2	ENSG00000172243	CLEC7A
2	ENSG00000172530	BANP
2	ENSG00000172548	NIPAL4
2	ENSG00000173039	RELA
2	ENSG00000173083	HPSE
2	ENSG00000173110	HSPA6
2	ENSG00000173334	TRIB1
2	ENSG00000173338	KCNK7
2	ENSG00000173451	THAP2
2	ENSG00000173530	TNFRSF10D
2	ENSG00000173559	NABP1
2	ENSG00000173812	EIF1
2	ENSG00000173846	PLK3
2	ENSG00000174125	TLR1
2	ENSG00000174238	PITPNA
2	ENSG00000174485	DENND4A
2	ENSG00000174718	RESF1
2	ENSG00000174944	P2RY14
2	ENSG00000175003	SLC22A1
2	ENSG00000175197	DDIT3
2	ENSG00000175352	NRIP3
2	ENSG00000175471	MCTP1
2	ENSG00000175592	FOSL1
2	ENSG00000175895	PLEKHF2
2	ENSG00000176170	SPHK1
2	ENSG00000176788	BASP1
2	ENSG00000177191	B3GNT8
2	ENSG00000177374	HIC1
2	ENSG00000177688	SUMO4
2	ENSG00000178381	ZFAND2A
2	ENSG00000178764	ZHX2
2	ENSG00000179388	EGR3
2	ENSG00000179598	PLD6
2	ENSG00000180316	PNPLA1
2	ENSG00000181016	LSMEM1
2	ENSG00000181045	SLC26A11
2	ENSG00000181381	DDX60L
2	ENSG00000181409	AATK
2	ENSG00000181444	ZNF467
2	ENSG00000181523	SGSH
2	ENSG00000181631	P2RY13
2	ENSG00000181634	TNFSF15
2	ENSG00000181649	PHLDA2
2	ENSG00000181790	ADGRB1
2	ENSG00000182022	CHST15
2	ENSG00000182310	SPACA6
2	ENSG00000182541	LIMK2
2	ENSG00000182782	HCAR2
2	ENSG00000182885	ADGRG3
2	ENSG00000183621	ZNF438
2	ENSG00000183762	KREMEN1
2	ENSG00000184163	C1QTNF12
2	ENSG00000184371	CSF1
2	ENSG00000184489	PTP4A3
2	ENSG00000184557	SOCS3
2	ENSG00000184588	PDE4B
2	ENSG00000184602	SNN
2	ENSG00000184922	FMNL1
2	ENSG00000185022	MAFF
2	ENSG00000185056	C5orf47
2	ENSG00000185201	IFITM2
2	ENSG00000185215	TNFAIP2
2	ENSG00000185262	UBALD2
2	ENSG00000185338	SOCS1
2	ENSG00000185736	ADARB2
2	ENSG00000185885	IFITM1
2	ENSG00000185897	FFAR3
2	ENSG00000185947	ZNF267
2	ENSG00000185955	SPACDR
2	ENSG00000186105	LRRC70
2	ENSG00000186431	FCAR
2	ENSG00000186469	GNG2
2	ENSG00000186480	INSIG1
2	ENSG00000186529	CYP4F3
2	ENSG00000186577	SMIM29
2	ENSG00000186583	SPATC1
2	ENSG00000186642	PDE2A
2	ENSG00000187037	GPR141
2	ENSG00000187479	C11orf96
2	ENSG00000187556	NANOS3
2	ENSG00000187605	TET3
2	ENSG00000187764	SEMA4D
2	ENSG00000187775	DNAH17
2	ENSG00000188056	TREML4
2	ENSG00000188211	NCR3LG1
2	ENSG00000188215	DCUN1D3
2	ENSG00000188290	HES4
2	ENSG00000188313	PLSCR1
2	ENSG00000188404	SELL
2	ENSG00000188766	SPRED3
2	ENSG00000188886	ASTL
2	ENSG00000188897
2	ENSG00000188906	LRRK2
2	ENSG00000188994	ZNF292
2	ENSG00000189067	LITAF
2	ENSG00000189430	NCR1
2	ENSG00000196189	SEMA4A
2	ENSG00000196268	ZNF493
2	ENSG00000196338	NLGN3
2	ENSG00000196352	CD55
2	ENSG00000196358	NTNG2
2	ENSG00000196562	SULF2
2	ENSG00000196611	MMP1
2	ENSG00000196663	TECPR2
2	ENSG00000196843	ARID5A
2	ENSG00000196878	LAMB3
2	ENSG00000196917	HCAR1
2	ENSG00000196923	PDLIM7
2	ENSG00000196954	CASP4
2	ENSG00000197006	METTL9
2	ENSG00000197013	ZNF429
2	ENSG00000197142	ACSL5
2	ENSG00000197329	PELI1
2	ENSG00000197467	COL13A1
2	ENSG00000197555	SIPA1L1
2	ENSG00000197599	CCDC154
2	ENSG00000197721	CR1L
2	ENSG00000197818	SLC9A8
2	ENSG00000197860	SGTB
2	ENSG00000198216	CACNA1E
2	ENSG00000198355	PIM3
2	ENSG00000198604	BAZ1A
2	ENSG00000198673	TAFA2
2	ENSG00000198734	F5
2	ENSG00000198736	MSRB1
2	ENSG00000198814	GK
2	ENSG00000198835	GJC2
2	ENSG00000198858	R3HDM4
2	ENSG00000198933	TBKBP1
2	ENSG00000204160	ZDHHC18
2	ENSG00000204165	CXorf65
2	ENSG00000204388	HSPA1B
2	ENSG00000204389	HSPA1A
2	ENSG00000204397	CARD16
2	ENSG00000204577	LILRB3
2	ENSG00000204592	HLA-E
2	ENSG00000204642	HLA-F
2	ENSG00000204936	CD177
2	ENSG00000205903	ZNF316
2	ENSG00000206047	DEFA1
2	ENSG00000213190	MLLT11
2	ENSG00000213347	MXD3
2	ENSG00000213462	ERV3-1
2	ENSG00000213694	S1PR3
2	ENSG00000213714	FAM209B
2	ENSG00000214193	SH3D21
2	ENSG00000214688	C10orf105
2	ENSG00000215301	DDX3X
2	ENSG00000217128	FNIP1
2	ENSG00000222009	BTBD19
2	ENSG00000226479	TMEM185B
2	ENSG00000229314	ORM1
2	ENSG00000229474	PATL2
2	ENSG00000232810	TNF
2	ENSG00000236334	PPIAL4G
2	ENSG00000241839	PLEKHO2
2	ENSG00000242802	AP5Z1
2	ENSG00000243279	PRAF2
2	ENSG00000243566	UPK3B
2	ENSG00000244115	DNAJC25-GNG10
2	ENSG00000244242	IFITM10
2	ENSG00000244482	LILRA6
2	ENSG00000244617	ASPRV1
2	ENSG00000247595	SPTY2D1OS
2	ENSG00000248099	INSL3
2	ENSG00000249992	TMEM158
2	ENSG00000250644
2	ENSG00000253276	CCDC71L
2	ENSG00000254087	LYN
2	ENSG00000254979
2	ENSG00000255150	EID3
2	ENSG00000255398	HCAR3
2	ENSG00000255423	EBLN2
2	ENSG00000256671	LIMS4
2	ENSG00000256812	CAPNS2
2	ENSG00000256977	LIMS3
2	ENSG00000257335	MGAM
2	ENSG00000257704	INAFM1
2	ENSG00000257743	MGAM2
2	ENSG00000258102	MAP1LC3B2
2	ENSG00000259330	INAFM2
2	ENSG00000259332	ST20-MTHFS
2	ENSG00000259529
2	ENSG00000261884
2	ENSG00000262406	MMP12
2	ENSG00000266094	RASSF5
2	ENSG00000269713	NBPF9
2	ENSG00000270339	PPIAL4H
2	ENSG00000271303	SRXN1
2	ENSG00000271383	NBPF19
2	ENSG00000272916
2	ENSG00000273136	NBPF26
2	ENSG00000273559	CWC25
2	ENSG00000274286	ADRA2B
2	ENSG00000275023	MLLT6
2	ENSG00000275302	CCL4
2	ENSG00000276070	CCL4L2
2	ENSG00000276085	CCL3L1
2	ENSG00000277443	MARCKS
2	ENSG00000277632	CCL3
2	ENSG00000278195	SSTR3
2	ENSG00000284461
2	ENSG00000284686
2	ENSG00000285444
2	ENSG00000285446
3	ENSG00000000971	CFH
3	ENSG00000001617	SEMA3F
3	ENSG00000006042	TMEM98
3	ENSG00000006118	TMEM132A
3	ENSG00000007216	SLC13A2
3	ENSG00000007384	RHBDF1
3	ENSG00000007866	TEAD3
3	ENSG00000008323	PLEKHG6
3	ENSG00000008441	NFIX
3	ENSG00000011347	SYT7
3	ENSG00000013588	GPRC5A
3	ENSG00000016082	ISL1
3	ENSG00000029993	HMGB3
3	ENSG00000039068	CDH1
3	ENSG00000039560	RAI14
3	ENSG00000041982	TNC
3	ENSG00000046604	DSG2
3	ENSG00000047457	CP
3	ENSG00000049283	EPN3
3	ENSG00000049759	NEDD4L
3	ENSG00000050030	NEXMIF
3	ENSG00000052344	PRSS8
3	ENSG00000053747	LAMA3
3	ENSG00000054179	ENTPD2
3	ENSG00000058453	CROCC
3	ENSG00000060656	PTPRU
3	ENSG00000062038	CDH3
3	ENSG00000064218	DMRT3
3	ENSG00000064655	EYA2
3	ENSG00000065054	SLC9A3R2
3	ENSG00000065361	ERBB3
3	ENSG00000066468	FGFR2
3	ENSG00000068078	FGFR3
3	ENSG00000069764	PLA2G10
3	ENSG00000070526	ST6GALNAC1
3	ENSG00000072201	LNX1
3	ENSG00000073150	PANX2
3	ENSG00000073712	FERMT2
3	ENSG00000073734	ABCB11
3	ENSG00000074047	GLI2
3	ENSG00000074181	NOTCH3
3	ENSG00000074276	CDHR2
3	ENSG00000074410	CA12
3	ENSG00000074527	NTN4
3	ENSG00000075213	SEMA3A
3	ENSG00000075275	CELSR1
3	ENSG00000075461	CACNG4
3	ENSG00000075673	ATP12A
3	ENSG00000076604	TRAF4
3	ENSG00000077063	CTTNBP2
3	ENSG00000077942	FBLN1
3	ENSG00000078295	ADCY2
3	ENSG00000078900	TP73
3	ENSG00000079257	LXN
3	ENSG00000080031	PTPRH
3	ENSG00000081923	ATP8B1
3	ENSG00000085552	IGSF9
3	ENSG00000085733	CTTN
3	ENSG00000086205	FOLH1
3	ENSG00000086548	CEACAM6
3	ENSG00000087510	TFAP2C
3	ENSG00000088280	ASAP3
3	ENSG00000088881	EBF4
3	ENSG00000088899	LZTS3
3	ENSG00000089199	CHGB
3	ENSG00000089356	FXYD3
3	ENSG00000091129	NRCAM
3	ENSG00000091513	TF
3	ENSG00000091986	CCDC80
3	ENSG00000092820	EZR
3	ENSG00000094755	GABRP
3	ENSG00000095596	CYP26A1
3	ENSG00000096696	DSP
3	ENSG00000099812	MISP
3	ENSG00000099864	PALM
3	ENSG00000099960	SLC7A4
3	ENSG00000100065	CARD10
3	ENSG00000100116	GCAT
3	ENSG00000100290	BIK
3	ENSG00000100842	EFS
3	ENSG00000100968	NFATC4
3	ENSG00000101144	BMP7
3	ENSG00000101443	WFDC2
3	ENSG00000101447	FAM83D
3	ENSG00000101850	GPR143
3	ENSG00000102174	PHEX
3	ENSG00000102359	SRPX2
3	ENSG00000102554	KLF5
3	ENSG00000102854	MSLN
3	ENSG00000102890	ELMO3
3	ENSG00000102934	PLLP
3	ENSG00000103044	HAS3
3	ENSG00000103056	SMPD3
3	ENSG00000103067	ESRP2
3	ENSG00000103089	FA2H
3	ENSG00000104140	RHOV
3	ENSG00000104369	JPH1
3	ENSG00000104611	SH2D4A
3	ENSG00000105289	TJP3
3	ENSG00000105357	MYH14
3	ENSG00000105388	CEACAM5
3	ENSG00000105426	PTPRS
3	ENSG00000105523	FAM83E
3	ENSG00000105538	RASIP1
3	ENSG00000105699	LSR
3	ENSG00000105894	PTN
3	ENSG00000105929	ATP6V0A4
3	ENSG00000105971	CAV2
3	ENSG00000105997	HOXA3
3	ENSG00000106278	PTPRZ1
3	ENSG00000106541	AGR2
3	ENSG00000106688	SLC1A1
3	ENSG00000107130	NCS1
3	ENSG00000108242	CYP2C18
3	ENSG00000108352	RAPGEFL1
3	ENSG00000108375	RNF43
3	ENSG00000108551	RASD1
3	ENSG00000108602	ALDH3A1
3	ENSG00000108947	EFNB3
3	ENSG00000109265	CRACD
3	ENSG00000109881	CCDC34
3	ENSG00000110328	GALNT18
3	ENSG00000110436	SLC1A2
3	ENSG00000110492	MDK
3	ENSG00000110811	P3H3
3	ENSG00000110987	BCL7A
3	ENSG00000111057	KRT18
3	ENSG00000111319	SCNN1A
3	ENSG00000112655	PTK7
3	ENSG00000112902	SEMA5A
3	ENSG00000113657	DPYSL3
3	ENSG00000113924	HGD
3	ENSG00000114019	AMOTL2
3	ENSG00000114251	WNT5A
3	ENSG00000114638	UPK1B
3	ENSG00000115257	PCSK4
3	ENSG00000115507	OTX1
3	ENSG00000115616	SLC9A2
3	ENSG00000115641	FHL2
3	ENSG00000115657	ABCB6
3	ENSG00000115884	SDC1
3	ENSG00000116299	ELAPOR1
3	ENSG00000117122	MFAP2
3	ENSG00000117407	ARTN
3	ENSG00000117525	F3
3	ENSG00000117791	MTARC2
3	ENSG00000118322	ATP10B
3	ENSG00000118523	CCN2
3	ENSG00000119888	EPCAM
3	ENSG00000120327	PCDHB14
3	ENSG00000120549	KIAA1217
3	ENSG00000120885	CLU
3	ENSG00000121039	RDH10
3	ENSG00000121900	TMEM54
3	ENSG00000123191	ATP7B
3	ENSG00000123358	NR4A1
3	ENSG00000124006	OBSL1
3	ENSG00000124429	POF1B
3	ENSG00000124466	LYPD3
3	ENSG00000124493	GRM4
3	ENSG00000125170	DOK4
3	ENSG00000125266	EFNB2
3	ENSG00000125285	SOX21
3	ENSG00000125378	BMP4
3	ENSG00000125968	ID1
3	ENSG00000126217	MCF2L
3	ENSG00000126460	PRRG2
3	ENSG00000128052	KDR
3	ENSG00000128567	PODXL
3	ENSG00000128591	FLNC
3	ENSG00000128641	MYO1B
3	ENSG00000128683	GAD1
3	ENSG00000129194	SOX15
3	ENSG00000129204	USP6
3	ENSG00000129451	KLK10
3	ENSG00000129514	FOXA1
3	ENSG00000129990	SYT5
3	ENSG00000130234	ACE2
3	ENSG00000130545	CRB3
3	ENSG00000130701	RBBP8NL
3	ENSG00000130707	ASS1
3	ENSG00000130751	NPAS1
3	ENSG00000130762	ARHGEF16
3	ENSG00000132470	ITGB4
3	ENSG00000132561	MATN2
3	ENSG00000132613	MTSS2
3	ENSG00000132698	RAB25
3	ENSG00000132744	ACY3
3	ENSG00000132746	ALDH3B2
3	ENSG00000133069	TMCC2
3	ENSG00000133401	PDZD2
3	ENSG00000133477	FAM83F
3	ENSG00000133740	E2F5
3	ENSG00000133985	TTC9
3	ENSG00000134258	VTCN1
3	ENSG00000134398	ERN2
3	ENSG00000134504	KCTD1
3	ENSG00000134569	LRP4
3	ENSG00000134716	CYP2J2
3	ENSG00000134757	DSG3
3	ENSG00000134762	DSC3
3	ENSG00000134827	TCN1
3	ENSG00000134873	CLDN10
3	ENSG00000135111	TBX3
3	ENSG00000135324	MRAP2
3	ENSG00000135480	KRT7
3	ENSG00000135750	KCNK1
3	ENSG00000135773	CAPN9
3	ENSG00000135898	GPR55
3	ENSG00000136153	LMO7
3	ENSG00000136379	ABHD17C
3	ENSG00000136848	DAB2IP
3	ENSG00000137203	TFAP2A
3	ENSG00000137266	SLC22A23
3	ENSG00000137648	TMPRSS4
3	ENSG00000137699	TRIM29
3	ENSG00000137709	POU2F3
3	ENSG00000137727	ARHGAP20
3	ENSG00000137843	PAK6
3	ENSG00000137968	SLC44A5
3	ENSG00000138131	LOXL4
3	ENSG00000138135	CH25H
3	ENSG00000138193	PLCE1
3	ENSG00000138271	GPR87
3	ENSG00000138411	HECW2
3	ENSG00000138696	BMPR1B
3	ENSG00000138759	FRAS1
3	ENSG00000138798	EGF
3	ENSG00000138823	MTTP
3	ENSG00000139044	B4GALNT3
3	ENSG00000139438	FAM222A
3	ENSG00000139445	FOXN4
3	ENSG00000139835	GRTP1
3	ENSG00000140254	DUOXA1
3	ENSG00000140279	DUOX2
3	ENSG00000140832	MARVELD3
3	ENSG00000140835	CHST4
3	ENSG00000141198	TOM1L1
3	ENSG00000141441	GAREM1
3	ENSG00000141448	GATA6
3	ENSG00000141579	ZNF750
3	ENSG00000141655	TNFRSF11A
3	ENSG00000141736	ERBB2
3	ENSG00000141738	GRB7
3	ENSG00000141934	PLPP2
3	ENSG00000142273	CBLC
3	ENSG00000142627	EPHA2
3	ENSG00000142700	DMRTA2
3	ENSG00000142798	HSPG2
3	ENSG00000142871	CCN1
3	ENSG00000142949	PTPRF
3	ENSG00000143036	SLC44A3
3	ENSG00000143061	IGSF3
3	ENSG00000143126	CELSR2
3	ENSG00000143217	NECTIN4
3	ENSG00000143224	PPOX
3	ENSG00000143416	SELENBP1
3	ENSG00000143502	SUSD4
3	ENSG00000143858	SYT2
3	ENSG00000143867	OSR1
3	ENSG00000143882	ATP6V1C2
3	ENSG00000144119	C1QL2
3	ENSG00000144452	ABCA12
3	ENSG00000144583	MARCHF4
3	ENSG00000144712	CAND2
3	ENSG00000144724	PTPRG
3	ENSG00000144834	TAGLN3
3	ENSG00000145103	ILDR1
3	ENSG00000145623	OSMR
3	ENSG00000146054	TRIM7
3	ENSG00000146411	SLC2A12
3	ENSG00000146674	IGFBP3
3	ENSG00000146950	SHROOM2
3	ENSG00000147041	SYTL5
3	ENSG00000147642	SYBU
3	ENSG00000147676	MAL2
3	ENSG00000147689	FAM83A
3	ENSG00000147697	GSDMC
3	ENSG00000148346	LCN2
3	ENSG00000148468	FAM171A1
3	ENSG00000148671	ADIRF
3	ENSG00000149090	PAMR1
3	ENSG00000149115	TNKS1BP1
3	ENSG00000149260	CAPN5
3	ENSG00000150556	LYPD6B
3	ENSG00000150687	PRSS23
3	ENSG00000151090	THRB
3	ENSG00000151338	MIPOL1
3	ENSG00000151632	AKR1C2
3	ENSG00000151693	ASAP2
3	ENSG00000151715	TMEM45B
3	ENSG00000152583	SPARCL1
3	ENSG00000152669	CCNO
3	ENSG00000152939	MARVELD2
3	ENSG00000153234	NR4A2
3	ENSG00000153292	ADGRF1
3	ENSG00000153714	LURAP1L
3	ENSG00000153721	CNKSR3
3	ENSG00000154040	CABYR
3	ENSG00000154162	CDH12
3	ENSG00000154165	GPR15
3	ENSG00000154274	C4orf19
3	ENSG00000154447	SH3RF1
3	ENSG00000154856	APCDD1
3	ENSG00000155066	PROM2
3	ENSG00000155093	PTPRN2
3	ENSG00000156413	FUT6
3	ENSG00000156453	PCDH1
3	ENSG00000156463	SH3RF2
3	ENSG00000157110	RBPMS
3	ENSG00000157214	STEAP2
3	ENSG00000157765	SLC34A2
3	ENSG00000157927	RADIL
3	ENSG00000157985	AGAP1
3	ENSG00000158315	RHBDL2
3	ENSG00000159166	LAD1
3	ENSG00000159648	TEPP
3	ENSG00000159714	ZDHHC1
3	ENSG00000160298	C21orf58
3	ENSG00000161281	COX7A1
3	ENSG00000161798	AQP5
3	ENSG00000161896	IP6K3
3	ENSG00000161996	WDR90
3	ENSG00000162069	BICDL2
3	ENSG00000162399	BSND
3	ENSG00000162437	RAVER2
3	ENSG00000162571	TTLL10
3	ENSG00000162738	VANGL2
3	ENSG00000162755	KLHDC9
3	ENSG00000162896	PIGR
3	ENSG00000162981	LRATD1
3	ENSG00000163362	INAVA
3	ENSG00000163435	ELF3
3	ENSG00000163531	NFASC
3	ENSG00000163629	PTPN13
3	ENSG00000163704	PRRT3
3	ENSG00000163898	LIPH
3	ENSG00000163959	SLC51A
3	ENSG00000164078	MST1R
3	ENSG00000164171	ITGA2
3	ENSG00000164287	CDC20B
3	ENSG00000164379	FOXQ1
3	ENSG00000164647	STEAP1
3	ENSG00000164683	HEY1
3	ENSG00000164855	TMEM184A
3	ENSG00000164920	OSR2
3	ENSG00000165138	ANKS6
3	ENSG00000165188	RNF183
3	ENSG00000165215	CLDN3
3	ENSG00000165795	NDRG2
3	ENSG00000165905	LARGE2
3	ENSG00000165912	PACSIN3
3	ENSG00000166173	LARP6
3	ENSG00000166415	WDR72
3	ENSG00000166473	PKD1L2
3	ENSG00000166510	CCDC68
3	ENSG00000166897	ELFN2
3	ENSG00000166979	EVA1C
3	ENSG00000167034	NKX3-1
3	ENSG00000167105	TMEM92
3	ENSG00000167165	UGT1A6
3	ENSG00000167183	PRR15L
3	ENSG00000167244	IGF2
3	ENSG00000167306	MYO5B
3	ENSG00000167644	C19orf33
3	ENSG00000167880	EVPL
3	ENSG00000167964	RAB26
3	ENSG00000168032	ENTPD3
3	ENSG00000168077	SCARA3
3	ENSG00000168350	DEGS2
3	ENSG00000168672	LRATD2
3	ENSG00000168952	STXBP6
3	ENSG00000169116	PARM1
3	ENSG00000169242	EFNA1
3	ENSG00000169908	TM4SF1
3	ENSG00000170011	MYRIP
3	ENSG00000170412	GPRC5C
3	ENSG00000170421	KRT8
3	ENSG00000170545	SMAGP
3	ENSG00000170577	SIX2
3	ENSG00000170786	SDR16C5
3	ENSG00000170899	GSTA4
3	ENSG00000171004	HS6ST2
3	ENSG00000171124	FUT3
3	ENSG00000171219	CDC42BPG
3	ENSG00000171345	KRT19
3	ENSG00000171680	PLEKHG5
3	ENSG00000171903	CYP4F11
3	ENSG00000171916	LGALS9C
3	ENSG00000172478	MAB21L4
3	ENSG00000172551	MUCL1
3	ENSG00000172817	CYP7B1
3	ENSG00000172955	ADH6
3	ENSG00000173114	LRRN3
3	ENSG00000173253	DMRT2
3	ENSG00000173702	MUC13
3	ENSG00000173898	SPTBN2
3	ENSG00000174132	FAM174A
3	ENSG00000174292	TNK1
3	ENSG00000174502	SLC26A9
3	ENSG00000174514	MFSD4A
3	ENSG00000174607	UGT8
3	ENSG00000174640	SLCO2A1
3	ENSG00000174938	SEZ6L2
3	ENSG00000174951	FUT1
3	ENSG00000175164	ABO
3	ENSG00000175287	PHYHD1
3	ENSG00000175793	SFN
3	ENSG00000175866	BAIAP2
3	ENSG00000175906	ARL4D
3	ENSG00000175928	LRRN1
3	ENSG00000176153	GPX2
3	ENSG00000176399	DMRTA1
3	ENSG00000176532	PRR15
3	ENSG00000176641	RNF152
3	ENSG00000176658	MYO1D
3	ENSG00000176907	TCIM
3	ENSG00000176920	FUT2
3	ENSG00000176927	EFCAB5
3	ENSG00000177106	EPS8L2
3	ENSG00000177383	MAGEF1
3	ENSG00000178078	STAP2
3	ENSG00000178467	P4HTM
3	ENSG00000178826	TMEM139
3	ENSG00000179178	TMEM125
3	ENSG00000179403	VWA1
3	ENSG00000179913	B3GNT3
3	ENSG00000180730	SHISA2
3	ENSG00000180801	ARSJ
3	ENSG00000181019	NQO1
3	ENSG00000181392	SYNE4
3	ENSG00000181449	SOX2
3	ENSG00000182107	TMEM30B
3	ENSG00000182195	LDOC1
3	ENSG00000182580	EPHB3
3	ENSG00000182795	C1orf116
3	ENSG00000183111	ARHGEF37
3	ENSG00000183421	RIPK4
3	ENSG00000183569	SERHL2
3	ENSG00000183840	GPR39
3	ENSG00000184012	TMPRSS2
3	ENSG00000184254	ALDH1A3
3	ENSG00000184292	TACSTD2
3	ENSG00000184363	PKP3
3	ENSG00000184564	SLITRK6
3	ENSG00000184731	FAM110C
3	ENSG00000185100	ADSS1
3	ENSG00000185361	TNFAIP8L1
3	ENSG00000185442	FAM174B
3	ENSG00000185479	KRT6B
3	ENSG00000185532	PRKG1
3	ENSG00000185551	NR2F2
3	ENSG00000185567	AHNAK2
3	ENSG00000186204	CYP4F12
3	ENSG00000186212	SOWAHB
3	ENSG00000187372	PCDHB13
3	ENSG00000187860	CCDC157
3	ENSG00000188064	WNT7B
3	ENSG00000188175	HEPACAM2
3	ENSG00000188385	JAKMIP3
3	ENSG00000188643	S100A16
3	ENSG00000188910	GJB3
3	ENSG00000188959	C9orf152
3	ENSG00000189143	CLDN4
3	ENSG00000189221	MAOA
3	ENSG00000189280	GJB5
3	ENSG00000189377	CXCL17
3	ENSG00000189433	GJB4
3	ENSG00000196104	SPOCK3
3	ENSG00000196344	ADH7
3	ENSG00000196411	EPHB4
3	ENSG00000196542	SPTSSB
3	ENSG00000196569	LAMA2
3	ENSG00000196935	SRGAP1
3	ENSG00000197140	ADAM32
3	ENSG00000197256	KANK2
3	ENSG00000197410	DCHS2
3	ENSG00000197446	CYP2F1
3	ENSG00000197496	SLC2A10
3	ENSG00000197641	SERPINB13
3	ENSG00000197712	FAM114A1
3	ENSG00000198074	AKR1B10
3	ENSG00000198183	BPIFA1
3	ENSG00000198435	NRARP
[truncated: 5,349 more rows]
