# Supplementary material for: Airway immune signatures of protection and disease progression in recent human tuberculosis household contacts
Source: bioRxiv preprint, doi:10.64898/2026.01.29.702551, version 1 (2026-02-02)
Supplement: Supplementary Table 5 [file 702551_file07.xlsx]

## Sheet: a_Cell Counts
Group ->		IGRAneg																				IGRApos_PET-CTneg									IGRApos_PET-CTpos														Progressor
Sample ->	Total	C091_B	C093_B	C115_B	C128_B	C134_B	C135_B	C142_B	C154_B	C220_B	C098_B	C131_B	C118_B	C034_B	C110_B	C231_B	C089_B	C189_B	C070_F	C224_B	C224_F	C157_F	C223_B	C052_F	C090_B	C090_F	C107_B	C107_F	C155_B	C155_F	C141_B	C141_F	C079_F	C239_B	C106_B	C106_F	C211_B	C211_F	C140_B	C182_B	C039_F	C233_B	C233_F	C225_F	C222_B	C122_B	C103_F	P103_P	C074_F
0_AM_APOC2	112106	336	305	2274	4823	947	3924	3191	3197	4955	1287	1123	332	436	1188	804	279	1570	2166	219	42	2523	1137	4146	889	883	929	1570	2781	2766	2417	4103	5798	2965	1474	2455	2142	2585	4762	2137	844	1753	1411	424	3497	447	1166	986	60
1_AM_IFI27	90912	295	423	1598	614	1912	701	1514	1718	3462	1232	3668	88	471	647	392	221	2052	503	900	223	1838	3594	565	710	749	459	745	2249	3099	1570	2766	2946	2029	1494	2827	1545	1755	1079	1025	283	1766	1647	1873	642	214	496	490	110
10_AM	84409	974	626	973	2194	2765	2197	1226	2594	1414	1462	1761	597	222	666	315	196	713	2071	227	33	1338	3057	2849	1834	1743	1272	1915	2757	2772	940	2148	1769	3039	555	952	898	1108	2721	1091	309	2575	2892	1312	2984	141	370	314	97
11_AM	60874	746	356	874	1321	1763	1346	1062	1705	733	764	1510	267	189	662	305	291	574	761	264	67	1188	2306	1217	1494	1547	734	1352	2146	1939	719	1682	1802	1575	401	813	859	1303	747	1863	136	2411	1570	903	1682	100	309	246	69
13_AM_FN1_CCL18	57634	396	266	702	1723	1613	523	991	1001	1102	1129	1382	577	171	662	307	133	566	1405	371	67	875	2735	1231	1084	811	512	783	1465	1657	910	1877	1000	881	495	923	716	1033	1952	1035	208	1925	1856	991	1658	86	288	255	55
14_AM_Mito-high	57227	809	427	1489	2160	683	1133	940	776	395	748	1081	160	278	1185	393	481	705	1022	408	115	1314	686	1064	1581	1524	1241	1465	734	671	1504	1451	2028	776	1463	1033	1542	1947	930	237	502	2566	747	339	802	218	343	286	138
21_AM_proliferating	10926	43	35	171	224	360	143	229	132	300	160	273	98	29	93	38	24	269	154	100	24	159	433	156	125	135	47	109	141	248	295	434	575	161	172	198	133	115	115	104	36	229	150	230	333	13	107	183	12
17_AM_stressed	28239	220	86	249	650	316	354	477	348	869	260	272	72	34	96	43	193	249	344	471	113	242	969	355	281	296	179	195	615	449	205	384	837	747	199	291	1616	1821	369	2286	46	807	302	157	283	68	191	123	24
16_AM_IFN-responsive	29486	170	131	362	1106	365	239	298	460	1136	332	842	73	189	268	364	79	530	155	509	111	454	773	147	237	351	194	299	484	380	655	678	1082	577	289	584	523	535	173	347	47	561	529	425	302	84	496	368	19
25_AM_RSRP1_NRAMP1	4527	11	11	18	61	31	50	35	25	162	15	36	54	6	23	38	20	54	67	24	38	75	107	314	18	60	23	50	40	94	40	26	40	160	24	63	56	65	278	85	32	70	149	77	88	7	61	77	8
12_Mo-derived AM_APOE	57676	628	571	682	1566	1330	1241	732	711	1198	306	764	312	238	622	390	285	717	895	1234	196	462	1114	1205	598	728	548	1113	2090	1600	525	815	1471	875	632	1304	1098	1301	591	2058	262	1482	990	748	1392	212	566	633	45
15_Mo-derived AM_FPR3	40522	144	104	319	836	308	384	368	296	1114	289	434	423	123	318	543	169	482	583	1006	176	330	749	507	200	218	274	398	416	449	623	825	631	394	218	494	608	731	527	2304	250	582	451	984	432	109	699	1011	45
26_Mo-derived AM_TPP1	122	0	0	0	0	0	0	0	0	0	0	0	0	0	0	0	0	0	0	0	0	0	0	0	0	0	0	0	0	0	0	0	0	0	0	0	0	0	0	0	0	0	0	0	0	0	0	0	0
18_Monocyte	10206	10	25	33	154	22	25	54	47	147	70	96	140	110	136	235	54	72	62	311	143	25	114	104	20	36	86	134	50	37	160	103	103	91	31	98	310	141	69	302	51	84	66	363	43	37	136	172	6
19_cDC1_Monocyte	5539	11	18	49	268	59	22	74	49	158	80	51	65	58	60	70	92	91	54	124	55	31	89	79	24	20	53	74	55	74	83	75	65	90	28	61	84	68	138	320	37	80	53	142	63	14	97	160	2
20_Migratory DC	851	5	4	8	29	5	3	6	23	26	9	13	1	11	19	9	3	10	5	30	10	6	24	6	4	1	7	10	11	9	35	20	20	13	4	8	38	22	16	34	7	11	11	23	6	3	9	13	0
24_pDC	664	0	2	3	21	1	0	0	10	19	7	2	4	2	4	9	19	13	2	13	11	11	6	3	0	1	0	3	3	5	11	11	13	5	4	21	5	5	6	25	2	3	1	40	0	0	13	26	1
2_Neutrophil_IFIT2_IL1RN	40711	30	24	57	174	78	102	36	93	155	21	182	67	174	228	2132	147	207	22	314	116	70	172	41	57	45	208	60	136	103	98	143	185	45	51	101	88	125	28	211	103	94	92	220	70	16	116	85	34
3_Neutrophil_CXCR4-high	46743	14	27	17	103	51	109	15	37	72	11	70	98	145	322	1459	111	55	51	140	99	27	79	165	22	15	206	39	70	76	53	60	79	24	15	36	58	68	19	239	80	75	58	249	51	13	49	78	35
6_CD4 T cell_Naive_Stem	39139	29	98	211	204	151	74	84	174	926	377	143	19	67	161	333	130	422	15	3135	725	824	507	8	51	77	240	176	337	205	508	412	577	317	239	1279	190	236	131	611	9	223	400	358	63	78	1086	2069	50
4_CD4 T cell_Effector	43825	39	97	207	160	147	73	129	325	992	423	230	13	68	168	514	121	301	32	1723	554	1278	770	7	50	85	152	156	546	284	622	497	581	282	197	985	268	405	102	786	16	295	783	276	66	104	1575	2396	43
8_Treg_FOXP3	10228	17	20	31	73	34	17	10	43	133	82	36	9	24	21	63	36	55	13	1439	222	159	121	4	10	19	47	42	56	37	97	79	173	107	59	365	36	69	41	138	7	52	112	164	21	7	299	631	23
5_CD8A T cell	41404	46	118	169	228	342	76	80	193	2002	300	156	21	64	146	511	126	612	21	5650	958	517	372	20	34	51	295	159	424	225	544	329	436	331	162	604	212	181	136	502	32	278	384	382	57	81	956	2396	53
7_gd T cell_NK_ILC	10792	26	79	43	109	45	19	19	61	248	162	59	10	28	50	165	84	203	9	696	270	144	338	2	27	40	43	49	117	95	112	72	159	122	48	206	72	90	15	108	9	91	110	213	24	8	354	347	48
9_T cell_proliferating	5340	12	6	22	34	54	11	15	12	157	81	13	3	8	20	46	24	38	3	392	55	136	33	2	6	13	24	20	48	37	38	66	70	31	40	128	39	40	21	37	4	38	45	108	10	23	106	163	15
22_B cell	2570	2	7	5	61	4	5	7	12	48	47	3	13	47	8	17	16	32	7	96	62	32	35	18	4	0	11	9	10	2	25	10	42	7	10	66	20	17	8	187	1	8	9	32	8	4	78	97	8
23_Mast cell	1487	0	1	2	71	2	0	2	2	15	10	7	5	2	4	69	29	10	1	123	15	6	8	5	1	0	1	6	8	7	4	3	4	11	1	10	9	10	3	102	5	3	5	10	2	0	23	57	11
Total cell count	894159
Sample suffix key:
_B, baseline
_F, followup
_P, progression
[truncated: 29 more columns]

## Sheet: b_Percentages
Group ->	IGRAneg																				IGRApos_PET-CTneg									IGRApos_PET-CTpos														Progressor
Sample ->	C091_B	C093_B	C115_B	C128_B	C134_B	C135_B	C142_B	C154_B	C220_B	C098_B	C131_B	C118_B	C034_B	C110_B	C231_B	C089_B	C189_B	C070_F	C224_B	C224_F	C157_F	C223_B	C052_F	C090_B	C090_F	C107_B	C107_F	C155_B	C155_F	C141_B	C141_F	C079_F	C239_B	C106_B	C106_F	C211_B	C211_F	C140_B	C182_B	C039_F	C233_B	C233_F	C225_F	C222_B	C122_B	C103_F	P103_P	C074_F	P074_P
0_AM_APOC2	6.7	7.89	21.52	25.43	7.07	30.73	27.52	22.76	22.59	13.32	7.9	9.43	13.65	15.28	8.41	8.3	14.81	20.78	1.1	0.93	17.94	5.59	29.16	9.5	9.35	11.93	14.36	15.63	15.97	18.89	21.52	25.78	18.94	17.75	15.44	16.27	16.39	31.8	11.76	25.44	9.71	9.52	3.84	23.99	21.42	11.67	7.22	5.93	2.3
1_AM_IFI27	5.88	10.94	15.12	3.24	14.28	5.49	13.06	12.23	15.78	12.75	25.82	2.5	14.75	8.32	4.1	6.57	19.35	4.83	4.52	4.96	13.07	17.68	3.97	7.58	7.93	5.9	6.82	12.64	17.89	12.27	14.51	13.1	12.96	17.99	17.77	11.74	11.12	7.2	5.64	8.53	9.78	11.11	16.96	4.4	10.25	4.97	3.59	10.88	4.08
10_AM	19.43	16.19	9.21	11.57	20.65	17.2	10.57	18.47	6.45	15.13	12.4	16.96	6.95	8.56	3.29	5.83	6.73	19.87	1.14	0.73	9.51	15.04	20.04	19.59	18.45	16.34	17.52	15.5	16	7.35	11.26	7.87	19.41	6.68	5.99	6.82	7.02	18.17	6	9.31	14.26	19.51	11.88	20.47	6.76	3.7	2.3	9.59	1.36
11_AM	14.88	9.21	8.27	6.96	13.17	10.54	9.16	12.14	3.34	7.91	10.63	7.58	5.92	8.51	3.19	8.65	5.41	7.3	1.33	1.49	8.45	11.34	8.56	15.96	16.37	9.43	12.37	12.06	11.2	5.62	8.82	8.01	10.06	4.83	5.11	6.52	8.26	4.99	10.25	4.1	13.35	10.59	8.18	11.54	4.79	3.09	1.8	6.82	2.68
13_AM_FN1_CCL18	7.9	6.88	6.64	9.08	12.05	4.1	8.55	7.13	5.02	11.68	9.73	16.39	5.35	8.51	3.21	3.95	5.34	13.48	1.86	1.49	6.22	13.45	8.66	11.58	8.58	6.58	7.16	8.24	9.57	7.11	9.84	4.45	5.63	5.96	5.8	5.44	6.55	13.03	5.69	6.27	10.66	12.52	8.97	11.37	4.12	2.88	1.87	5.44	1.5
14_AM_Mito-high	16.14	11.04	14.09	11.39	5.1	8.87	8.11	5.53	1.8	7.74	7.61	4.54	8.7	15.24	4.11	14.3	6.65	9.81	2.05	2.56	9.34	3.37	7.48	16.89	16.13	15.94	13.4	4.13	3.87	11.76	7.61	9.02	4.96	17.62	6.49	11.71	12.34	6.21	1.3	15.13	14.21	5.04	3.07	5.5	10.45	3.43	2.09	13.65	3.3
21_AM_proliferating	0.86	0.91	1.62	1.18	2.69	1.12	1.98	0.94	1.37	1.66	1.92	2.78	0.91	1.2	0.4	0.71	2.54	1.48	0.5	0.53	1.13	2.13	1.1	1.34	1.43	0.6	1	0.79	1.43	2.31	2.28	2.56	1.03	2.07	1.24	1.01	0.73	0.77	0.57	1.08	1.27	1.01	2.08	2.28	0.62	1.07	1.34	1.19	0.43
17_AM_stressed	4.39	2.22	2.36	3.43	2.36	2.77	4.11	2.48	3.96	2.69	1.91	2.04	1.06	1.23	0.45	5.74	2.35	3.3	2.36	2.51	1.72	4.77	2.5	3	3.13	2.3	1.78	3.46	2.59	1.6	2.01	3.72	4.77	2.4	1.83	12.27	11.54	2.46	12.58	1.39	4.47	2.04	1.42	1.94	3.26	1.91	0.9	2.37	2.27
16_AM_IFN-responsive	3.39	3.39	3.43	5.83	2.73	1.87	2.57	3.28	5.18	3.44	5.93	2.07	5.92	3.45	3.81	2.35	5	1.49	2.56	2.47	3.23	3.8	1.03	2.53	3.72	2.49	2.74	2.72	2.19	5.12	3.56	4.81	3.69	3.48	3.67	3.97	3.39	1.16	1.91	1.42	3.11	3.57	3.85	2.07	4.02	4.97	2.69	1.88	1.82
25_AM_RSRP1_NRAMP1	0.22	0.28	0.17	0.32	0.23	0.39	0.3	0.18	0.74	0.16	0.25	1.53	0.19	0.3	0.4	0.59	0.51	0.64	0.12	0.84	0.53	0.53	2.21	0.19	0.64	0.3	0.46	0.22	0.54	0.31	0.14	0.18	1.02	0.29	0.4	0.43	0.41	1.86	0.47	0.96	0.39	1.01	0.7	0.6	0.34	0.61	0.56	0.79	0.23
12_Mo-derived AM_APOE	12.53	14.77	6.45	8.26	9.93	9.72	6.31	5.06	5.46	3.17	5.38	8.86	7.45	8	4.08	8.47	6.76	8.59	6.2	4.36	3.28	5.48	8.47	6.39	7.71	7.04	10.18	11.75	9.24	4.1	4.27	6.54	5.59	7.61	8.2	8.34	8.25	3.95	11.32	7.9	8.21	6.68	6.77	9.55	10.16	5.67	4.63	4.45	3.74
15_Mo-derived AM_FPR3	2.87	2.69	3.02	4.41	2.3	3.01	3.17	2.11	5.08	2.99	3.05	12.01	3.85	4.09	5.68	5.03	4.55	5.59	5.05	3.91	2.35	3.68	3.57	2.14	2.31	3.52	3.64	2.34	2.59	4.87	4.33	2.81	2.52	2.62	3.11	4.62	4.63	3.52	12.68	7.53	3.22	3.04	8.91	2.96	5.22	7	7.4	4.45	5
26_Mo-derived AM_TPP1	0	0	0	0	0	0	0	0	0	0	0	0	0	0	0	0	0	0	0	0	0	0	0	0	0	0	0	0	0	0	0	0	0	0	0	0	0	0	0	0	0	0	0	0	0	0	0	0	0
18_Monocyte	0.2	0.65	0.31	0.81	0.16	0.2	0.47	0.33	0.67	0.72	0.68	3.98	3.44	1.75	2.46	1.61	0.68	0.59	1.56	3.18	0.18	0.56	0.73	0.21	0.38	1.1	1.23	0.28	0.21	1.25	0.54	0.46	0.58	0.37	0.62	2.35	0.89	0.46	1.66	1.54	0.47	0.45	3.29	0.29	1.77	1.36	1.26	0.59	1.57
19_cDC1_Monocyte	0.22	0.47	0.46	1.41	0.44	0.17	0.64	0.35	0.72	0.83	0.36	1.85	1.82	0.77	0.73	2.74	0.86	0.52	0.62	1.22	0.22	0.44	0.56	0.26	0.21	0.68	0.68	0.31	0.43	0.65	0.39	0.29	0.57	0.34	0.38	0.64	0.43	0.92	1.76	1.12	0.44	0.36	1.29	0.43	0.67	0.97	1.17	0.2	1.12
20_Migratory DC	0.1	0.1	0.08	0.15	0.04	0.02	0.05	0.16	0.12	0.09	0.09	0.03	0.34	0.24	0.09	0.09	0.09	0.05	0.15	0.22	0.04	0.12	0.04	0.04	0.01	0.09	0.09	0.06	0.05	0.27	0.1	0.09	0.08	0.05	0.05	0.29	0.14	0.11	0.19	0.21	0.06	0.07	0.21	0.04	0.14	0.09	0.1	0	0.13
24_pDC	0	0.05	0.03	0.11	0.01	0	0	0.07	0.09	0.07	0.01	0.11	0.06	0.05	0.09	0.56	0.12	0.02	0.07	0.24	0.08	0.03	0.02	0	0.01	0	0.03	0.02	0.03	0.09	0.06	0.06	0.03	0.05	0.13	0.04	0.03	0.04	0.14	0.06	0.02	0.01	0.36	0	0	0.13	0.19	0.1	0.4
2_Neutrophil_IFIT2_IL1RN	0.6	0.62	0.54	0.92	0.58	0.8	0.31	0.66	0.71	0.22	1.28	1.9	5.45	2.93	22.29	4.37	1.95	0.21	1.58	2.58	0.5	0.85	0.29	0.61	0.48	2.67	0.55	0.76	0.59	0.77	0.75	0.82	0.29	0.61	0.64	0.67	0.79	0.19	1.16	3.1	0.52	0.62	1.99	0.48	0.77	1.16	0.62	3.36	1.15
3_Neutrophil_CXCR4-high	0.28	0.7	0.16	0.54	0.38	0.85	0.13	0.26	0.33	0.11	0.49	2.78	4.54	4.14	15.26	3.3	0.52	0.49	0.7	2.2	0.19	0.39	1.16	0.24	0.16	2.65	0.36	0.39	0.44	0.41	0.31	0.35	0.15	0.18	0.23	0.44	0.43	0.13	1.32	2.41	0.42	0.39	2.25	0.35	0.62	0.49	0.57	3.46	0.96
6_CD4 T cell_Naive_Stem	0.58	2.53	2	1.08	1.13	0.58	0.72	1.24	4.22	3.9	1.01	0.54	2.1	2.07	3.48	3.87	3.98	0.14	15.74	16.11	5.86	2.49	0.06	0.54	0.81	3.08	1.61	1.89	1.18	3.97	2.16	2.57	2.02	2.88	8.04	1.44	1.5	0.87	3.36	0.27	1.23	2.7	3.24	0.43	3.74	10.87	15.14	4.95	15.49
4_CD4 T cell_Effector	0.78	2.51	1.96	0.84	1.1	0.57	1.11	2.31	4.52	4.38	1.62	0.37	2.13	2.16	5.37	3.6	2.84	0.31	8.65	12.31	9.09	3.79	0.05	0.53	0.9	1.95	1.43	3.07	1.64	4.86	2.61	2.58	1.8	2.37	6.19	2.04	2.57	0.68	4.32	0.48	1.63	5.28	2.5	0.45	4.98	15.77	17.54	4.25	17.02
8_Treg_FOXP3	0.34	0.52	0.29	0.38	0.25	0.13	0.09	0.31	0.61	0.85	0.25	0.26	0.75	0.27	0.66	1.07	0.52	0.12	7.22	4.93	1.13	0.6	0.03	0.11	0.2	0.6	0.38	0.31	0.21	0.76	0.41	0.77	0.68	0.71	2.29	0.27	0.44	0.27	0.76	0.21	0.29	0.76	1.49	0.14	0.34	2.99	4.62	2.27	4.75
5_CD8A T cell	0.92	3.05	1.6	1.2	2.55	0.6	0.69	1.37	9.13	3.1	1.1	0.6	2	1.88	5.34	3.75	5.77	0.2	28.36	21.29	3.68	1.83	0.14	0.36	0.54	3.79	1.45	2.38	1.3	4.25	1.73	1.94	2.11	1.95	3.8	1.61	1.15	0.91	2.76	0.96	1.54	2.59	3.46	0.39	3.88	9.57	17.54	5.24	17.47
7_gd T cell_NK_ILC	0.52	2.04	0.41	0.57	0.34	0.15	0.16	0.43	1.13	1.68	0.42	0.28	0.88	0.64	1.73	2.5	1.91	0.09	3.49	6	1.02	1.66	0.01	0.29	0.42	0.55	0.45	0.66	0.55	0.88	0.38	0.71	0.78	0.58	1.3	0.55	0.57	0.1	0.59	0.27	0.5	0.74	1.93	0.16	0.38	3.54	2.54	4.75	6.83
9_T cell_proliferating	0.24	0.16	0.21	0.18	0.4	0.09	0.13	0.09	0.72	0.84	0.09	0.09	0.25	0.26	0.48	0.71	0.36	0.03	1.97	1.22	0.97	0.16	0.01	0.06	0.14	0.31	0.18	0.27	0.21	0.3	0.35	0.31	0.2	0.48	0.8	0.3	0.25	0.14	0.2	0.12	0.21	0.3	0.98	0.07	1.1	1.06	1.19	1.48	2.72
22_B cell	0.04	0.18	0.05	0.32	0.03	0.04	0.06	0.09	0.22	0.49	0.02	0.37	1.47	0.1	0.18	0.48	0.3	0.07	0.48	1.38	0.23	0.17	0.13	0.04	0	0.14	0.08	0.06	0.01	0.2	0.05	0.19	0.04	0.12	0.41	0.15	0.11	0.05	1.03	0.03	0.04	0.06	0.29	0.05	0.19	0.78	0.71	0.79	0.78
23_Mast cell	0	0.03	0.02	0.37	0.01	0	0.02	0.01	0.07	0.1	0.05	0.14	0.06	0.05	0.72	0.86	0.09	0.01	0.62	0.33	0.04	0.04	0.04	0.01	0	0.01	0.05	0.04	0.04	0.03	0.02	0.02	0.07	0.01	0.06	0.07	0.06	0.02	0.56	0.15	0.02	0.03	0.09	0.01	0	0.23	0.42	1.09	0.92
Sample suffix key:
_B, baseline
_F, followup
_P, progression
[truncated: 28 more columns]
